# Differential adaptive potential and vulnerability to climate-driven habitat loss in Brazilian mangroves

João De Deus Vidal Jr.<sup>1</sup>, Gustavo M. Mori<sup>2</sup>, Mariana V. Cruz<sup>3, 4</sup>, Michele F. da Silva<sup>3, 4</sup>, Yohans A. de Moura<sup>3, 4</sup>, Anete P. de Souza<sup>3, 4\*</sup>

<sup>1</sup>State University of Campinas, Brazil, <sup>2</sup>Institute of Biosciences, São Paulo State University, Brazil,

<sup>3</sup>Centro de Biologia Molecular e Engenharia Genética, Universidade Estadual de Campinas, Brazil,

<sup>4</sup>Department of Plant Biology, Institute of Biology, University of Campinas, Brazil

*Submitted to Journal:*  
Frontiers in Conservation Science

*Specialty Section:*  
Conservation Genomics

*Article type:*  
Original Research Article

*Manuscript ID:*  
763325

*Received on:*  
23 Aug 2021

*Revised on:*  
11 Feb 2022

*Journal website link:*  
[www.frontiersin.org](http://www.frontiersin.org)

### *Conflict of interest statement*

The authors declare that the research was conducted in the absence of any commercial or financial relationships that could be construed as a potential conflict of interest

### *Author contribution statement*

JDV developed the methodology, prepared the figures, and wrote the foundation manuscript and supplementary data. GMM conceived the study, provided data and assisted with constructing the body text. MVC conceived the study, generated the genomic data and analyzed the data. MFS assisted with the discussion of the results and manuscript writing. YAM assisted with the manuscript writing and the discussion of the results. APS conceived the study and provided project leadership.

### *Keywords*

Population Genetics, Niche modeling, convergent genetics, Adaptive potential, *Avicennia germinans*

### *Abstract*

Word count: 298

Geographic and environmental differences have been identified as factors influencing Brazilian mangrove trees' genetic diversity. Geographically, distinct species have convergent spatial genetic structures, indicating a limited gene flow between northern and southern populations. Environmentally, genomic studies and common garden experiments have found evidence of local adaptations along the latitudinal gradient of the Brazilian coast. However, little is known about how such adaptive heterogeneity could be affected by a rapidly changing climate in the coming decades, and the combination of deforestation and climate-induced habitat loss may affect these forests and their genetic diversity. Here, we applied two genomic-environmental association methods to model the turnover of potentially adaptive alleles for two dominant mangrove trees: *Avicennia germinans* and *A. schaueriana*. We analyzed a total of 134 individuals from six populations of *A. germinans* and ten populations of *A. schaueriana* spanning the Brazilian coast from 1 °S to 28 °S. Gradient forest models identified temperature-related variables as the most important predictors for *A. germinans* outlier loci, whereas both temperature and precipitation were important for *A. schaueriana*. We modeled allele frequencies and projected them for future climatic scenarios to estimate adaptively driven vulnerability. We assessed climate-driven habitat loss through climate-only distribution models and calculated annual deforestation rates for each sampled region. Finally, to assess the vulnerability of individual populations, we combined the environmental suitability, deforestation data, and adaptive vulnerability projections. For both species, subtropical populations presented a higher vulnerability than equatorial populations to climate-driven habitat loss. We also identified deforestation rates at the sampled sites that were alarmingly higher than the global average mangrove deforestation rate. Our results provide improved estimates of the impacts of ongoing climate change and human-caused habitat loss on the distribution of mangroves and highlight the importance of site-based conservation strategies that consider individual subtropical and equatorial mangrove forests.

### *Contribution to the field*

Our research evaluates the vulnerability of two species of Brazilian mangrove trees to climate-induced habitat loss using a genomic-environmental approach. We were able to demonstrate that populations found at intermediate latitudes along the Brazilian coastal gradient will be more vulnerable to higher temperatures and drier conditions than clearly equatorial or subtropical populations of either species, mostly due to local adaptations. We also quantified recent forest cover loss for each area and predicted the loss of suitability due to climate only to provide robust estimates of vulnerability for each population. Our results provide an important resource for conservation planning and demonstrate the potential application of novel genomic-environmental methods.

### *Funding statement*

This work was supported by the Conselho Nacional de Desenvolvimento Científico e Tecnológico (CNPq) in the form of a scholarship to JDV (process number 153973/2018-8), a research grant to GMM (process number 448286/2014-9), and a research fellowship to APS (process number 312777/2018-3). GMM acknowledges the Fundação de Amparo à Pesquisa do Estado de São Paulo (FAPESP) for research fellowships (process numbers 2013/08086-1, PD BEPE 2014/22821-9). MVC thanks the FAPESP for a Ph.D. scholarship (process number 2013/26793-7). YAM thanks the FAPESP for a fellowship (process number 2019/21100-00) and the Coordenação de Aperfeiçoamento de Pessoal de Nível Superior-CAPES (process number 88887.373880/2019-00) for Ph.D. scholarships. MFS thanks the FAPESP (process number 2020/00203-2) for a Ph.D. scholarship. APS also thanks the CAPES Computational Biology Program (process number 88882.160095/2013-01) for a research grant. This study was financed in part by CAPES (Finance Code 001).

*Ethics statements*

*Studies involving animal subjects*

Generated Statement: No animal studies are presented in this manuscript.

*Studies involving human subjects*

Generated Statement: No human studies are presented in this manuscript.

*Inclusion of identifiable human data*

Generated Statement: No potentially identifiable human images or data is presented in this study.

*Data availability statement*

Generated Statement: The original contributions presented in the study are included in the article/supplementary material, further inquiries can be directed to the corresponding author/s.

In review

# 1 **Differential adaptive potential and vulnerability to climate-driven** 2 **habitat loss in Brazilian mangroves**

3 **João de Deus Vidal Junior<sup>12</sup>, Gustavo Maruyama Mori<sup>3</sup>, Mariana Vargas Cruz<sup>12</sup>, Michele**  
4 **Fernandes da Silva<sup>12</sup>, Yohans Alves de Moura<sup>121</sup> & Anete Pereira de Souza<sup>12\*</sup>**

5 <sup>1</sup> University of Campinas - UNICAMP, Department of Plant Biology. Rua Monteiro Lobato, 255.  
6 Cidade Universitária "Zeferino Vaz" - Barão Geraldo - Campinas – SP. P.O. Box 6109 CEP 13083–  
7 970.

8 <sup>2</sup> University of Campinas - UNICAMP, Molecular Biology and Genetic Engineering Center  
9 (CBMEG). Av. Cândido Rondon, 400, Cidade Universitária Zeferino Vaz - Barão Geraldo -  
10 Campinas - SP, Brazil. P.O. Box 6010 CEP 13083–875.

11 <sup>3</sup> São Paulo State University - UNESP, Institute of Biosciences, São Vicente. Praça Infante Dom  
12 Henrique s/n. São Vicente - SP. P.O. Box 73601, CEP 11380–972.

13 **\* Correspondence:**  
14 Corresponding Author  
15 [anete@unicamp.br](mailto:anete@unicamp.br)

16

17 **Keywords:** population genetics, niche modeling, convergent genetics, adaptive potential.

18

## 19 **Abstract**

20 **Geographic and environmental differences have been identified as factors influencing Brazilian**  
21 **mangrove trees' genetic diversity.** Geographically, distinct species have convergent spatial genetic

22 structures, indicating a limited gene flow between northern and southern populations.

23 Environmentally, genomic studies and common garden experiments have found evidence of local

24 adaptations along the latitudinal gradient of the Brazilian coast. However, little is known about how

25 such adaptive heterogeneity could be affected by a rapidly changing climate in the coming decades,

26 and the combination of deforestation and climate-induced habitat loss may affect these forests and

27 their genetic diversity. Here, we applied two genomic-environmental association methods to model

28 the turnover of potentially adaptive alleles for two dominant mangrove trees: *Avicennia germinans*

29 and *A. schaueriana*. We analyzed a total of 134 individuals from six populations of *A. germinans* and

30 ten populations of *A. schaueriana* spanning the Brazilian coast from 1 °S to 28 °S. Gradient forest

31 models identified temperature-related variables as the most important predictors for *A. germinans*

## Brazilian *Avicennia* climatic vulnerability

32 outlier loci, whereas both temperature and precipitation were important for *A. schaueriana*. We  
33 modeled allele frequencies and projected them for future climatic scenarios to estimate adaptively  
34 driven vulnerability. We assessed climate-driven habitat loss through climate-only distribution  
35 models and calculated annual deforestation rates for each sampled region. Finally, to assess the  
36 vulnerability of individual populations, we combined the environmental suitability, deforestation  
37 data, and adaptive vulnerability projections. For both species, subtropical populations presented a  
38 higher vulnerability than equatorial populations to climate-driven habitat loss. We also identified  
39 deforestation rates at the sampled sites that were alarmingly higher than the global average mangrove  
40 deforestation rate. Our results provide improved estimates of the impacts of ongoing climate change  
41 and human-caused habitat loss on the distribution of mangroves and highlight the importance of site-  
42 based conservation strategies that consider individual subtropical and equatorial mangrove forests.

43

### 44 1. Introduction

45 The potential of species to respond to the rapid pace of human-induced climatic change constitutes a  
46 major concern for biological conservation worldwide. Model-based estimates indicate that under a  
47 moderate carbon dioxide emission scenario, almost 25% of species across most taxonomic groups  
48 could face extinction by 2050 (Thomas et al. 2004). Communities in coastal environments, such as  
49 mangrove forests, are among the most vulnerable systems due to the high specificity of their niches,  
50 the sea-level rise predicted for this century (Gilman et al. 2008, Sippo et al. 2018, Friess et al. 2018),  
51 and the pace of climate change (Loarie et al. 2009). Given the ecological relevance of these  
52 communities for carbon fixation (Eong 1993) and habitat formation (Tomlinson 1986) and their high  
53 vulnerability (Hoegh-Guldberg & Bruno 2010, Polidoro et al. 2010), mangroves constitute a key  
54 target for biodiversity conservation and climate change mitigation.

55 The strong human pressure on coastal regions and the historically high deforestation rates in  
56 mangroves constitute additional challenges to the long-term viability of mangrove populations under  
57 future climatic scenarios. These factors negatively impact the availability and connectivity of  
58 habitats, compromising the ability of mangrove species to occupy areas within their climatic  
59 tolerances (Jump & Peñuelas 2005). However, despite the observed progress in mangrove  
60 conservation during the last decade (Goldberg et al. 2020), these forests are still declining globally by

61 approximately 0.4% of their area per year and are considered critically endangered in 26 out of the  
62 more than 100 countries where they occur (Duke et al. 2007).

63 Although human-driven deforestation is the main threat to mangroves, habitat loss may also  
64 affect the long-term capacity of their populations to persist and respond to future climatic scenarios.  
65 Ongoing climatic changes are promoting range shifts, especially toward higher latitudes, for several  
66 species of animals and plants (Chen et al. 2011), including mangroves (Osland et al. 2016). However,  
67 **this** shift depends on the survivability, dispersal capacity, and migration rates of the species, factors  
68 that were limited in plants during past climatic oscillations (Davis & Shaw 2001). Additionally,  
69 climate change has been linked to higher mortality and other negative effects on mangrove forests  
70 (Duke et al. 2017, Lovelock et al. 2017), although these effects may be highly variable between  
71 populations along environmental gradients.

72 In South America, mangroves occupy ca. 2 million hectares, mostly along the Brazilian coast  
73 (FAO 2007), with estimated impacts on the regional economy between US \$33,000 and 57,000 per  
74 hectare per year (UNEP, 2014). In Brazil, due to the country's wide geographic extent that ranges  
75 from 33.75°S to 5.27°N and the variety of environmental conditions found along the coastal  
76 latitudinal gradient, mangrove forests are naturally exposed to widely variable adaptive pressures  
77 (Cruz et al. 2020, da Silva et al. 2021). While populations from the northern coast of the country  
78 inhabit equatorial environments with a high annual rainfall and warmer temperatures, southern  
79 populations reach latitudes as low as 28°S and occupy subtropical areas with lower temperatures and  
80 less annual precipitation. This climatic variability has been associated with differentiation in the  
81 **adaptive** genetic composition of the mangrove populations, especially in loci related to temperature,  
82 solar radiation, and water stress (Bajay et al. 2018, Cruz et al. 2020, da Silva et al. 2021). As a result,  
83 temperature rise and changes in precipitation patterns may differentially affect the persistence and  
84 survival of populations due to local adaptations, such as those reported for the dominant species  
85 *Avicennia germinans* and *A. schaueriana* (*Acanthaceae*) (Cruz et al. 2020, da Silva et al. 2021).

86 Combined with environmentally driven divergence, neutral forces play a key role in  
87 population genetics. Mangrove trees have high dispersal potential due to their waterborne propagules  
88 (fruits or seeds), but long-distance dispersal events are rare, which **causes** limited connectivity among  
89 populations (Van der Stocken et al. 2019). At regional and biogeographic scales, abiotic factors such  
90 as coastal geomorphology (e.g., Triest et al. 2020), landmasses (e.g., Cerón-Souza et al. 2015,  
91 Ochoa-Zavala et al. 2019, Mori et al. 2021), and ocean currents and eddies (e.g., Mori et al. 2015,

## Brazilian *Avicennia* climatic vulnerability

92 Cerón-Souza et al. 2015, Kennedy et al. 2016, Triest et al. 2021, da Silva et al. 2021) influence how  
93 propagules move across geographical space. As these factors shape propagule dispersal, they may  
94 lead to the differentiation of populations and, consequently, their genetic divergence. Restricted gene  
95 flow, in turn, may facilitate local adaptation in each population (Kawecki & Ebert 2004, Savolainen  
96 et al. 2007). Despite advances in scientific knowledge on population genetics, for most species,  
97 especially those in South American mangroves (Cruz et al. 2019), little is known about the  
98 distribution of **adaptive** variation, making it difficult to estimate the capacity of these plants to adapt  
99 to novel climates and to develop suitable conservation efforts.

100 Recently, methodological advances have made it possible to model how differences in  
101 adaptation along environmental gradients may affect the vulnerability of individual populations to  
102 climatic changes (Fitzpatrick & Keller 2015, Bay et al. 2018). These approaches take into account the  
103 frequencies of potentially adaptive alleles identified with environmental-genotypic correlation  
104 methods and apply statistical models to simulate the required allele frequencies under future  
105 environmental projections. Combined with common garden experiments, this type of simulation may  
106 provide powerful insights into the adaptive capacity of populations under environmental changes  
107 (Fitzpatrick et al. 2021). Here, we implemented a genomic-environmental approach to predict how  
108 populations of two mangrove species, *A. germinans* and *A. schaueriana*, may adapt to future climatic  
109 conditions. We tested the association between **adaptive** allelic diversity and modern climatic  
110 conditions and projected populations' allelic diversity into the geographic space under future climatic  
111 scenarios. We estimated individual populations' risks of both climate-induced habitat loss and  
112 deforestation and discussed the implications of these data on the long-term viability of these forests.  
113 Our findings highlight the need to develop specific population-focused conservation strategies and  
114 highlight the importance of considering local adaptations in species conservation.

115

## 116 **Materials and Methods**

### 117 *Population sampling and genomic sequencing*

118 The overall methodology is described in Figure 1. We used a genomic dataset previously  
119 obtained by our research group (Cruz et al. 2019, 2020) via high-throughput DNA sequencing to  
120 model the adaptive potential of *A. germinans* and *A. schaueriana* populations under future climate



121 scenarios. The dataset comprises 57 adult *A. germinans* trees sampled at six populations spanning  
122 latitudes from  $-0.71^{\circ}$  to  $-8.59^{\circ}$  and 77 adult *A. schaueriana* trees sampled at ten populations spanning  
123 latitudes from  $-0.82^{\circ}$  to  $-28.48^{\circ}$  (Fig. 2, Table 1). Full population information is available in Table 1.  
124 For each individual, total DNA was previously extracted using the DNeasy Plant Mini Kit (Qiagen,  
125 Hilden, Germany) and NucleoSpin Plant II Kit (Macherey Nagel). We used NEXTERA-tagmented,  
126 reductively amplified DNA (nextRAD) library preparation, a method that uses Nextera technology  
127 (Illumina Inc., USA) to simultaneously fragment and tag target DNA with sequencing adapters  
128 (Russello et al. 2015) to identify and genotype SNPs. The methods used to build and sequence  
129 nextRAD libraries and to process reads are described in the original manuscripts (Cruz et al. 2019,  
130 2020). The sequences obtained through the nextRAD libraries were filtered by Cruz et al. (2020) and  
131 Cruz et al. (2019) using a maximum threshold of 65% for missing data, Phred scores greater than 30,  
132 with  $8\times$  minimum coverage, a single SNP per locus, and a minor allele frequency  $\geq 0.05$  with vcftools  
133 v.0.1.12b46 (Danecek et al., 2011). The dataset we used comprised 2,297 and 6,170 SNP loci for *A.*  
134 *germinans* and *A. schaueriana*, respectively, which were then used in the genome-environment  
135 association step.

136

### 137 *Genomic scan for loci under adaptation and allelic frequency modeling*

138 We followed the method by Fitzpatrick & Keller (2015), who developed an approach for  
139 adapting a community turnover modeling method based on the gradient forest (GF) algorithm (Smith  
140 & Ellis, 2020) applied to allelic frequency datasets along environmental gradients. The GF algorithm  
141 applies a machine-learning algorithm to subset values of allele frequencies and associates these  
142 values with transitions along gradients of environmental variables. By doing so, it is possible to  
143 evaluate the biological variation across environmental gradients and to project that variation to future  
144 climatic scenarios (Fitzpatrick & Keller 2015). In the first step, we identified loci that are potentially  
145 under selection by scanning genome-wide datasets for outlier loci using the package “PCAdapt”  
146 version 4.3.3 (Luu et al. 2020) for the R platform (R core team, 2018); this package detects loci-  
147 correlated population structures using a false discovery rate (FDR) of  $< 0.1$ . Using environmental  
148 and geographic distance variables as predictors, this test can calculate the z scores obtained when  
149 adjusting SNPs to the selected principal components, providing a measurement of the deviation of  
150 each locus from the mean genetic variation.



## **Brazilian *Avicennia* climatic vulnerability**

151 To minimize the occurrence of **false positives**, in addition to using PCAdapt, we also  
152 implemented an additional genotype-environment association (GEA) method based on redundancy  
153 analysis (RDA) developed by Forester et al. (2018). RDA is also based on ordination, but unlike  
154 PCAdapt, RDA is able to constrain the analysis with environmental variables and is more efficient at  
155 detecting true positives under certain evolutionary scenarios. We ran RDA using the R package  
156 “vegan” version 2.5-7 (Oksanen et al., 2020), using a twofold standard deviation cutoff ( $p < 0.05$ ) as  
157 a threshold. We overlaid both lists of candidate loci and excluded loci that were not simultaneously  
158 identified by both methods.

159 We subset the genomic dataset into a reference dataset with 300 randomly selected reference  
160 SNPs and an outlier dataset comprising **all outlier SNPs**. For each locus, we calculated individual  
161 population allelic frequencies using the function “makefreq()” from the package adegenet version  
162 2.1.5 (Jombart 2008). We fitted gradient forest models for both the reference and outlier SNPs vs.  
163 environmental predictors using the function “gradientForest()” in the R package gradientForest  
164 version 0.1-18 (Smith & Ellis, 2020) using 500 bootstrapped trees and no transformation of the  
165 dataset. We calculated the importance of each environmental predictor in the allelic frequency of  
166 both species by using the impurity reduction measured by the Gini index (Breiman et al., 1984). To  
167 measure the vulnerability to future climatic conditions, we compared the spatial patterns of potential  
168 adaptive genetic variation between current and future climates with a modified Procrustes analysis  
169 using the principal components computed from PCAdapt, following Fitzpatrick & Keller (2015).  
170 Procrustes analysis compares matrices in a dataset by “rotating a matrix to maximum similarity with  
171 a target matrix, minimizing the sum of squared differences” (from Oksanen et al. 2020). This  
172 approach has been applied to compare ordination results in genomic modeling studies (Fitzpatrick &  
173 Keller, 2014) and is particularly useful for comparisons using multidimensional scaling (Oksanen et  
174 al. 2020). The implementation of the method to raster objects in R is based on the function  
175 “procrustes()” of the package “vegan”, as applied in Fitzpatrick & Keller (2015) and modified by  
176 Maier (2018).

177

178 *Environmental analysis and distribution modeling*

179 We used models generated with the GF algorithm to estimate the geographic distributions of  
180 allelic frequencies and to project them to future climate scenarios. To generate the models and  
181 identify PCA-significant loci, we used the set of 30-arc second resolution bioclimatic variables from  
182 CHELSA version 2.1 (Karger et al. 2017) and Bio-ORACLE version 2.2 mean surface temperature  
183 and salinity data (Assis et al. 2018). To minimize overfitting in the modeling steps, we performed a  
184 variable selection step by randomly sampling 1,000 points within the region of interest using the  
185 function “sampleRandom()” in the R package raster version 3.4–13 (Hijmans, 2021) and calculating  
186 Pearson’s correlation for the stack of eight environmental predictors (two oceanic and five  
187 bioclimatic) using the R function “cor()” from the R package stats version 3.6.3 (R Core Team,  
188 2020). We randomly removed variables from highly correlated pairs (i.e., Pearson’s correlation >  
189 0.7) and restricted the environmental dataset to include only the less correlated environmental  
190 predictors: oceanic salinity and oceanic surface temperature, bio1 (mean annual air temperature),  
191 bio3 (isothermality), bio7 (annual range of air temperature), bio12 (annual precipitation amount),  
192 bio15 (precipitation seasonality), and gsl (growing season length). We also obtained the geographic  
193 distance between pairs of populations from Silva et al. (2020), which calculated the pairwise  
194 distances based on the coastline extent. For the future scenario, we used projected datasets for the  
195 years 2070-2100 for the bioclimatic predictors under the SSP5-8.5 emission scenario based on the  
196 Max Planck Institute Earth System Model (MPI-ESM1.2) (Gutjahr et al., 2019), which combines  
197 high-resolution circulation models for the atmospheric and oceanic climate mean states. For the Bio-  
198 ORACLE dataset, the future scenario predictors available are projected for the years 2090-2100  
199 based on CMIP5 RCP 85, which is the previous version of SSP5-8.5. Future climatic projections are  
200 developed and released by the World Climate Research Programme (WCRP) Coupled Model  
201 Intercomparison Project (CMIP). Climate models featured in CMIP include one “very high baseline  
202 scenario”, namely, RCP 85 on CMIP5 (Taylor et al. 2012) and SSP5-8.5 on CMIP6 (Eyring et al.,  
203 2016). Both models depict the highest emissions, no-policy baseline scenario, with SSP5-8.5  
204 showing approximately 20% higher CO<sub>2</sub> emissions by 2100 and lower emissions of other  
205 greenhouse gases than its previous version, the RCP8.5 scenario, which estimates a 3.7 °C (ranging  
206 from 2.6 to 4.8) increase in temperature by 2100. We generated a 50 km buffer around each  
207 occurrence point and extracted the values of the variables within the area. Next, we used a thin-plate  
208 spline regression function from the “fields” package version 12.5 (Nychka et al. 2017) to interpolate  
209 values for continental-scale cells—a necessary step for the projection of the generated distribution  
210 models. We also obtained the geographic distance between pairs of populations from Silva et al.  
211 (2020), which calculated the pairwise distances based on the coastline extent. For the modeling step,

## Brazilian *Avicennia* climatic vulnerability

212 we adopted the nearest population distance as a measure of the relative geographic isolation of each  
213 population.

214 To compare the predictions of genomic and nongenomic models, we also generated and  
215 projected ensemble distribution models based on only environmental factors using the R package  
216 “SSDM” version 0.2.8 (Schmitt et al. 2017). We downloaded and filtered records for both species  
217 from the Global Biodiversity Information Facility (GBIF) using the R package coordinateCleaner  
218 version 2.0–18 (Zizka et al. 2019) and obtained a total of 1,350 occurrence records for *A. germinans*  
219 and 373 for *A. schaueriana*. We modeled each species distribution, combining generalized linear  
220 model (GLM), artificial neural network (ANN), support vector machine (SVM), multivariate  
221 adaptive regression spline (MARS), and random forest (RF) methods, available in SSDM, which  
222 were demonstrated to show similar high sensitivity–specificity ratios for narrow-niche species (Qiao  
223 et al. 2015). By adopting an ensemble modeling approach, we aimed to account for the differential  
224 performances of modeling algorithms while ensuring that the results reflected the most accurate  
225 projections. One repetition per algorithm and the kappa value were used as the model-weighted  
226 ensemble metrics for evaluation. To calculate the importance of each environmental predictor in the  
227 geographic distribution of both species, we calculated Pearson’s correlation  $r$  between the predictions  
228 of each model and a model calculated after removing that variable to obtain a value of  $1-r$ , indicating  
229 the relative importance of each predictor to the model. We also projected the ensemble models to the  
230 SSP5-8.5 scenario. Finally, we converted the present and predicted distributions into presence-  
231 absence models and calculated the predicted area loss per population using the R package “raster”.

232

### 233 *Forest cover loss estimation per population*

234 To evaluate the habitat loss risk for individual populations, we also calculated forest cover  
235 loss between 2001 and 2020 for each of the sample sites using the Global Forest Change dataset  
236 version 1.8 (Hansen et al. 2013), available at a 1 arc-second resolution (ca. 30 meters at the equator).  
237 This dataset is based on a global-scale automatized classification of Landsat 7 Enhanced Thematic  
238 Mapper Plus (ETM+) scenes. To calculate individual forest cover losses, we obtained raster values of  
239 the year of deforestation and the original forest cover bands (namely, ‘yearloss’ and ‘treecover2000’)  
240 from Hansen et al. (2013) using the Google Earth Engine version 0.1.276 (Gorelick et al. 2017)

241 platform. We clipped these layers to each sampled population's geographic extent using a geographic  
242 buffer of 10 km and exported the individual population rasters to R. In R, using the "raster" package,  
243 we calculated the original forest area (i.e., canopy >80%), the percentage of annual deforestation, and  
244 the variation in deforestation compared to the previous year. The future suitability projection rasters  
245 based on outlier loci were then randomly subset using the remaining forest cover since 2000 and  
246 calculated for each subpopulation to address the impacts of deforestation on the vulnerability of  
247 individual populations.

248

## 249 **Results**

### 250 *Differences in allele frequencies between current and future environmental scenarios*

251 From 57 individuals from six populations of *A. germinans*, we obtained 2,297 loci and  
252 identified 262 outliers with PCADapt, 154 with RDA, and 132 using both methods simultaneously.  
253 For *A. schaueriana*, we sampled 77 individuals from ten populations and recovered 6,170 loci and  
254 224 outliers with PCADapt, 276 with RDA, and 182 with both methods simultaneously. The GF  
255 models identified the (1) annual range in air temperature, (2) precipitation seasonality, (3) mean  
256 annual air temperature, and (4) precipitation seasonality as the most important predictors for the *A.*  
257 *germinans* and *A. schaueriana* outliers (Table 2). The lowest values of variable importance in the  
258 gradient forest models for *A. germinans* outlier loci were the (1) annual precipitation amount, (2)  
259 growing season length, (3) number of >10 °C growing degree days, and (4) ocean surface  
260 temperature. For *A. schaueriana*, the less important predictors for outlier locus frequencies were the  
261 (1) annual precipitation amount, (2) growing season length, and (3) ocean salinity.

262 Future climate conditions based on differences between modern and future frequencies of  
263 putatively adaptive alleles (i.e., Procrustes differences) identified the most pronounced climate  
264 vulnerability in four *A. germinans* populations, ALC, PNB, PRC, and TMD (Fig. 3) and two *A.*  
265 *schaueriana* populations, ALC and VER (Fig. 4), both on the extremes of the distribution ranges of  
266 the species. Overall, the Procrustes differences were lower for *A. schaueriana* than for *A. germinans*,  
267 and the lowest mean differences for *A. germinans* were observed in the PCR and ALC populations,  
268 while those for *A. schaueriana* were observed in the FLN population.

269

## Brazilian *Avicennia* climatic vulnerability

### 270 *Forest cover loss estimation per population*

271 Since the beginning of the analyzed time series (2000), all the regions combined have lost ca.  
272 79 km<sup>2</sup> of the initial 1,350 km<sup>2</sup> forest cover quantified in 2001, representing a total loss of 5.86%  
273 over two decades. The highest total forest area losses were observed in PRC and VER, with losses of  
274 10.1 and 9.29 km<sup>2</sup>, respectively, accounting for 30.29% of the total observed loss. Comparatively,  
275 regions such as PPR, UBA, PAR, CNN, and PNB each lost less than 1.47 km<sup>2</sup> and were the least  
276 affected by deforestation of the studied locations.

277 The average cover loss was substantially higher than the global rates of loss (0.4% per year)  
278 for four of the six regions with *A. germinans* (MRJ, PNB, PRC, and TMD) and a single region with  
279 *A. schaueriana* populations, namely, PRC (Table S1). Proportional cover loss per year is increasing  
280 in all the regions except TMD. Full statistical data related to the annual area loss, remaining area, loss  
281 since the previous year, loss variation, mean annual loss, and total loss are available in  
282 Supplementary Table 2. Based on the current deforestation rates, all populations show declining  
283 trends (Figures 3 and 4). *Avicennia germinans* populations present higher projected and observed  
284 deforestation rates, with PRC showing the higher forest cover loss since 2000 (96.81%). For *A.*  
285 *schaueriana*, the most vulnerable populations are PRC and LGN, with 96.81% and 22.72% forest  
286 cover losses since 2000, respectively.

287 The climate-only distribution models also showed contrasting scenarios for the north- and  
288 south- of the northeastern extremity of South America (NEESA) populations (Fig. 5). For  
289 populations of both species located at higher latitudes (TMD for *A. germinans*; UBA, PPR, CNN,  
290 and FLN for *A. schaueriana*), the models indicated an increase in the distribution range toward upper  
291 coastal areas under the SSP5-8.5 scenario by 2100. However, for populations at lower latitudes (i.e.,  
292 north-NEESA), the distribution range was projected to slightly decrease. Interestingly, while both  
293 species presented an increase in total area in the southern portions of their distributions, their  
294 southernmost geographic limits did not change (remaining at 23 °S for *A. germinans* and at 28 °S for  
295 *A. schaueriana*), but a slight increase in suitability was projected for the southernmost populations,  
296 especially for *A. schaueriana*. The population-level cell count variation for each species is listed in  
297 Supplementary Table 2.

298

299 **Discussion**

300 We found evidence that *A. germinans* populations in TMD, ALC, and MRJ were the most  
301 vulnerable over the studied area based on the combined need for changes in putatively adaptive  
302 allelic frequencies and the estimated probability of climate-induced habitat loss. This result was  
303 partially consistent with our climate-only distribution models, which identified a reduced suitability  
304 for populations in ALC and MRJ but indicated an increase in suitability for populations in TMD. The  
305 recent deforestation rate was higher in PRC, MRJ, and ALC than in the other locations, with the PRC  
306 region having lost a remarkably high fraction (28%) of forest cover area from 2019 to 2020. For *A.*  
307 *schaueriana*, the VER population showed a higher genome-environmental vulnerability, and the  
308 ALC, GPM, and LGN populations showed higher deforestation percentages.

309 The climate-only models showed a slight decrease in suitability for two equatorial  
310 populations (MRJ and ALC), while other subtropical areas (with the exception of PPR) were  
311 projected to increase in suitability. Our models suggest that the rates of deforestation among  
312 populations in subtropical areas are higher than the global average rates of deforestation. These  
313 results may indicate concerning scenarios for subtropical populations due to the effects of the  
314 dangerous combination of limited gene flow, habitat fragmentation, connectivity loss, climate-  
315 induced habitat loss, and limited population gene pools on the long-term persistence of Brazilian  
316 mangroves. The projected forest cover loss for the *A. germinans* populations PRC and TMD indicates  
317 that some populations may be more vulnerable to land-use change and deforestation than to the  
318 potential risks of climate-induced habitat loss. Both of these areas also present high values of  
319 Procrustes differences for the frequencies of potentially selective loci, ranking them as the most  
320 vulnerable populations in our analysis.

321

322 *Differences in the vulnerability of individual populations to climatic change*

323 Overall, the mean Procrustes differences were not significantly different between the northern  
324 and southern populations of either species. However, higher individual Procrustes differences—i.e.,  
325 higher counts of grid cells requiring the greatest changes in allele frequencies—were observed at  
326 intermediate latitudes in the PNB, PRC, and TMD populations of *A. germinans* and in the VER  
327 population of *A. schaueriana*. Furthermore, for *A. schaueriana*, the population vulnerability  
328 estimated by the mean Procrustes differences was lower toward the southern and northern areas



## Brazilian *Avicennia* climatic vulnerability

329 relative to the VER population. As higher mismatches in allele frequencies were calculated for  
330 populations located at intermediate latitudes, we presume that alleles putatively associated with better  
331 fitness under future conditions are currently found at low frequencies at these sites.

332 We define the northern and southern regions of NEESA as core groups related to genomic  
333 diversity. The PNB, PRC, TMD and VER populations occupy peripheral positions in relation to the  
334 range of both species (Fig. 2) and could be subjected to higher risks of extinction due to these  
335 peripheral environments (Hardie & Hutchings, 2010). The results identified by our models support  
336 the findings of Cruz et al. (2019) and Cruz et al. (2020), who identified contrasting allelic frequencies  
337 in the genes linked to decisive environmental pressures in central and marginal *Avicennia*  
338 populations in Brazil. Populations north of NEESA are mostly linked to equatorial climate and have  
339 alleles that are more frequently specifically linked to genes involved in regulation and response to  
340 light and saline saturation; in contrast, populations farther south along the Brazilian coast have alleles  
341 that are more linked to response to cold and water balance (Cruz et al. 2019, Cruz et al. 2020). In  
342 comparison, marginal subtropical and marginal equatorial populations present lower genetic  
343 diversities for these loci and reduced population sizes in comparison with the stable core populations.

344 The identification of this nonlinear response of loci to environmental gradients emphasizes  
345 the role of dispersal and gene flow between populations as a fundamental condition to ensure  
346 effective conservation of these forests, especially at intermediate latitudes. By sharing alleles through  
347 seedlings and pollen, populations across the geographic distribution of a species will be better suited  
348 to cope with novel environmental pressures due to increases in adaptive resources. However, since  
349 Brazilian mangroves are partially isolated in two geographic clusters (i.e., south-NEESA and north-  
350 NEESA), it is reasonable to assume that alleles with higher adaptive values may not be sufficiently  
351 shared between these populations through propagule dispersion. Thus, enhancing connectivity  
352 between the remaining fragments of mangrove forests, while necessary to ensure gene flow, might  
353 not be sufficient to provide the genomic resources necessary to withstand the warmer and drier  
354 conditions predicted for the next century. Therefore, based on the evidence reported here, we suggest  
355 that, in addition to enhancing connectivity between fragments, artificially inducing gene flow from  
356 north to south NEESA should be considered in the genetic management plans of *A. germinans* and *A.*  
357 *schaueriana*. This method has been deemed successful and recommended by Kottler et al. (2021) and  
358 Lidelli et al. (2021). Nonetheless, the allelic composition of the diversity sources must be carefully



359 chosen to promote allelic combinations that may confer local adaptations to the transitional  
360 environmental conditions to which TMD and VER populations might be exposed (Cruz et al. 2019,  
361 Cruz et al. 2020, Silva-Pereira et al. 2020). The benefits of this approach will likely overcome the  
362 risks associated with separate management of north- and south-NEESA populations, as suggested in  
363 various studies discussing conservation approaches for isolated populations (Frankham 2015, Liddell  
364 et al. 2021).

365 The results obtained for the identification of outlier loci, which were the foundation of the  
366 modeling step, require careful interpretation. Many factors may influence the results of selective  
367 locus identification, and sample size (especially if the number of loci is low) could inflate the  
368 detection of false-positive results by the algorithm used to identify the loci under selection (PCAdapt  
369 and RDA). Therefore, our results and the interpretation presented here are in the context of previous  
370 results presented for this dataset (i.e., Cruz et al., 2019, Silva et al., 2021), which support the strong  
371 influence of climate and precipitation on the local adaptation of *Avicennia* populations in Brazil.

372  
373 *Future climate scenarios reinforce abiotic stress in mangroves on the Brazilian coast*

374 Future projections of climatic variables indicate general warming and aridification trends for  
375 the Brazilian coast (Fig. 2). Surprisingly, niche models for *A. germinans* and *A. schaueriana* indicate  
376 an overall stability or increase in distribution ranges, with very slight reductions in environmentally  
377 suitable areas only for MRJ and ALC, two northern populations of *A. germinans* (Fig. 5). As  
378 previously reported (Mori et al. 2015, Bajay et al. 2018, Cruz et al. 2019 and 2020) and demonstrated  
379 in this study, the equatorial and subtropical portions of the Brazilian coast consist of distinct adaptive  
380 and demographic groups that will face different outcomes in a warmer and drier climate. Compared  
381 to subtropical latitudes, the equatorial region where *A. germinans* and *A. schaueriana* co-occur is  
382 hotter and drier (Fig. 2). Plants in this region show signs of heat stress in the field, with high  
383 expression levels of the heat shock protein-coding genes HSP17, 70, and 101 and the transcription  
384 factor RAP2.3 (ethylene-responsive binding factor) (Cruz et al. 2019). Similarly, for another  
385 dominant mangrove tree, *Rhizophora mangle* (*Rhizophoraceae*), equatorial populations were shown  
386 to be under severe stress caused by excessive heat (Bajay et al. 2018). Such evidence indicates that  
387 the increase in temperature in these regions will severely impact the mangrove tree populations,  
388 which are already under thermal stress.

## Brazilian *Avicennia* climatic vulnerability

389           The subtropical populations, however, will likely face different challenges. First, the increase  
390 in annual temperature can reduce the occurrence of freezing events, which are a key limiting factor  
391 for the occurrence of mangroves at high latitudes (Cook-Patton et al. 2015, Osland et al. 2020).  
392 Second, the reduction in precipitation combined with warming will lead to an increased atmospheric  
393 water vapor pressure deficit, which can have harmful effects on mangrove populations. Cruz et al.  
394 (2019) reported potential local adaptations that confer hydraulic and transpiration systems suitable  
395 for higher water availability on subtropical *A. schaueriana* populations, making them more  
396 susceptible to desiccation and cavitation than populations from warmer and drier equatorial regions  
397 (Markestejin et al. 2011).

398           For *A. germinans*, genetic variation with evidence of selection correlates with precipitation  
399 regimens and, more specifically, with the combination of the driest and coldest quarters of the year.  
400 These results corroborate those reported by Silva et al. (2021), who identified environmental  
401 isolation with patterns along atmospheric temperature, precipitation, and solar radiation gradients as  
402 the model that best explained genetic differentiation between populations of this species, and Cruz et  
403 al. (2020), who found that the molecular responses of *A. germinans* populations in these localities  
404 were associated with freshwater limitations and were more remarkable north of the South Equatorial  
405 Current (SEC), more precisely, in sites where freshwater inflows by rivers are scarcer. Precipitation  
406 regimes have commonly been related to coastal wetland forest distributions (Cavanaugh et al. 2018,  
407 Osland et al. 2015, Osland et al. 2016).

408           Freshwater variation also seems to be an important factor determining the vulnerability of  
409 populations of *A. germinans* to the climatic conditions predicted for the end of this century. We  
410 found greater future mean genetic displacement (Procrustes differences) in the TMD populations,  
411 followed by the MRJ and ALC populations. These populations currently face lower hydraulic stress  
412 due to a greater amplitude in the rainfall regime (TMD) and a greater inflow of freshwater from  
413 Amazonian rivers (MRJ). However, according to the climate predictions, they may be more likely to  
414 experience higher temperatures and drier climates and, consequently, increased water salinity. In  
415 addition, for the TMD population—and probably for the populations existing at the distribution limit  
416 of this species (ca. 22°S)—the bifurcation caused by the SEC and the north–south direction of the  
417 Brazilian current (BC) further limit the gene flow and genetic input that this population will need to  
418 withstand drier and hotter climates.

419           According to the genotype-environment association analyses, variations in temperature and  
420 precipitation patterns were important factors determining the genetic differentiation of *A.*  
421 *schaueriana* along the Brazilian coast. These results were consistent with those obtained by Cruz et  
422 al. (2019), who found variations in the loci present in the genomic regions functionally associated  
423 with biological processes related to responses to temperature, solar radiation, and freshwater  
424 availability, such as the response to osmotic stress, anthocyanin biosynthesis, protection against  
425 ultraviolet rays (UV), and biogenesis of the components of the photosynthetic apparatus. Silva et al.  
426 (2021) showed that for *A. schaueriana*, the environmental gradients of temperature and precipitation  
427 were closely correlated with the geographic variations represented by the latitudinal gradient.

428           We identified pronounced Procrustes differences between the frequencies of present and  
429 future outlier loci for the VER population (Veracruz-BA). This population is found south of the  
430 NEESA in a region with a lower average rainfall and higher temperatures than regions further south  
431 along the coast, such as UBA, CNN, PPR, FLN, and LGN. However, the variation in the future  
432 precipitation scenarios for VER is greater than that for all the other locations with populations of *A.*  
433 *schaueriana* (Fig. 2), suggesting drought as a potential stressor in the future. This scenario is also  
434 aggravated by the limited movement of propagules from the populations further south to the  
435 population in VER; the north–south direction of the BC restricts dispersal, limiting the exchange of  
436 genetic material between populations to the north and south of its bifurcation. For these localities, we  
437 recommend that reforestation measures should include seedlings with a higher tolerance to drought  
438 as well as local specimens.

439

#### 440 *Increase in deforestation rate in the last two decades*

441           We quantified alarmingly high and increasing rates of vegetation cover loss for Brazilian  
442 mangrove forests, with 15 out of 16 sites showing increasing trends and 10 out of 16 sites showing  
443 yearly percentage losses higher than the average global loss rate. A high recent deforestation rate was  
444 observed in the populations in PRC, MRJ, and ALC. Combined with the predicted future genomic-  
445 environmental pressures, these cover losses decrease the long-term resilience of these populations  
446 and threaten the maintenance of ecosystem services essential to mangrove-associated species and the  
447 human populations that rely on them.

## Brazilian *Avicennia* climatic vulnerability

448 Deforestation in mangroves affects multiple ecosystem services, but perhaps the most  
449 important consequence is the disproportionate loss in organic carbon fixation per area. It is estimated  
450 that Brazil accounts for more than 9% of the global mangrove-based carbon stock in its 7,674 km<sup>2</sup>  
451 area of mangrove forests (Hamilton & Friess, 2018); thus, land-use changes in this broad area can  
452 become significant sources of carbon emissions when the forests are removed. Locally, deforestation  
453 can lead to the disruption of ecological processes, an increase in edge effects, and the loss of multiple  
454 levels of genetic diversity, reducing the capacity of local communities to adapt to environmental  
455 changes (Baucom et al. 2005, Haddad et al. 2015). Available studies assessing the remaining genetic  
456 diversity of other mangrove species such as *Rhizophora apiculata*, a mangrove tree from the Eastern  
457 Hemisphere, identified high percentages of homozygotes in their populations, suggesting persistent  
458 inbreeding, which was attributed to habitat fragmentation and persistent low population sizes caused  
459 by deforestation (Azman et al. 2020). Low effective population sizes were also reported for  
460 mangroves in other regions of Asia, such as the Indo-Malayan coast, where lower genetic diversity  
461 greatly increased the vulnerability of less genetically diverse mangrove species to coastal flooding  
462 and sea-level variations (Guo et al. 2018). Recently, a global mangrove deforestation survey (Bryan-  
463 Brown et al. 2020) reported Brazilian mangroves to be hotspots of habitat loss, yet with “*lower rates*  
464 *of fragmentation*” compared to the fragmentation rates in other countries assessed in their study.  
465 However, this scenario is likely to change due to the rapid pace of forest cover loss that we identified.  
466 Our results indicate that mangrove population sizes and connectivity are likely to decrease, thus,  
467 deforestation may be an even more urgent threat to Brazilian mangroves than climate change because  
468 it is deteriorating the already limited evolutionary potential of its populations.

469

### 470 *Poleward migration in A. schaueriana and A. germinans*

471 The potential for range expansion toward higher latitudes was not identified by our ensemble  
472 distribution models. However, the higher vulnerability of the intermediate-latitude populations  
473 identified by the combined genomic-environmental models supports this scenario, which has been  
474 hypothesized for Brazil (Soares et al. 2012) and reported for regions on the west coast of South  
475 America (Saintlan et al. 2014) and in other places in the world, such as North America (Osland et al.  
476 2020), South Africa, Australia, and Asia (Saintlan et al. 2014). Globally, however, satellite imagery  
477 and literature reviews showed no evidence that mangroves are undergoing unassisted distribution

478 shifts to higher latitudes, even with temperatures increasing in their current distributions (Hickey et  
479 al. 2017). Therefore, Brazilian mangroves may be ‘trapped’ inside their current latitudinal  
480 distribution area, with their potential to adapt to the warming and drying conditions in this area  
481 strongly decreased by habitat loss and low connectivity. In Brazil, the southern limit of mangrove  
482 forests is located in Santo Antonio Lagoon in the municipality of Laguna (28°28’S; 48°50’W)  
483 (Soares et al. 2012), and this southern limit has not changed since at least 1990 (Saintlan et al. 2014).  
484 This geographic limitation is, however, most likely attributed to a restricted dispersal due to a local  
485 ocean current rather than to the environmental suitability of the region (Soares et al. 2012, Saintlan et  
486 al. 2014).

487         Given the environmental factors to which the studied species and populations are most  
488 sensitive, we recommend that conservation measures must take into account the adaptive  
489 particularities of each population along the Brazilian coast. Mitigating actions should be aimed not  
490 only at increasing connectivity and reducing fragmentation, as mentioned in the previous sections,  
491 but also at comprehensively sampling the functional factors of effective ecological restoration  
492 actions. Surprisingly, despite harboring a considerable fraction of global mangrove forests, South  
493 American mangroves are considerably underrepresented in the literature compared to Southeast  
494 Asian or Australian mangroves (e.g., Gorman 2018). Site-based conservation is essential because it  
495 allows the long-term persistence of many species by sustaining viable populations in their natural  
496 states. Our results demonstrate one of several potential applications of community-level modeling of  
497 genomic variation to improve predictions of the effects of climate change on population-level  
498 vulnerability, which is an important advancement in environmental-genomic biodiversity models.

499

## 500 **References**

501         Assis, J., Tyberghein, L., Bosch, S., Verbruggen, H., Serrão, E. A., & De Clerck, O. (2018).  
502 BioORACLE v2. 0: Extending marine data layers for bioclimatic modelling. *Global Ecology and*  
503 *Biogeography*, 27(3), 277-284.

504         Azman A, Ng K-K-S, Ng C-H, et al. (2020). Low genetic diversity indicating the threatened  
505 status of *Rhizophora apiculata* (*Rhizophoraceae*) in Malaysia: declined evolution meets habitat  
506 destruction. *Sci. Rep.* 10: 19112.

## Brazilian *Avicennia* climatic vulnerability

- 507 Bajay SK, Cruz MV, da Silva CC, Murad NF, Brandão MM, temperature-related and de  
508 Souza AP (2018) Extremophiles as a Model of a Natural Ecosystem: Transcriptional Coordination of  
509 Genes Reveals Distinct Selective Responses of Plants Under Climate Change Scenarios. *Front. Plant*  
510 *Sci.* 9:1376. doi: 10.3389/fpls.2018.01376
- 511 Baucom, R. S., Estill, J. C., & Cruzan, M. B. (2005). The effect of deforestation on the  
512 genetic diversity and structure in *Acer saccharum* (Marsh): Evidence for the loss and restructuring of  
513 genetic variation in a natural system. *Conservation Genetics.* 6:1, 39–50.
- 514 Bay, R. A., Harrigan, R. J., Le Underwood, V., Gibbs, H. L., Smith, T. B., & Ruegg, K.  
515 (2018). Genomic signals of selection predict climate-driven population declines in a migratory bird.  
516 *Science*, 359(6371), 83-86.
- 517 Breiman, L., Friedman, J., Olshen, R., & Stone, C. (1984). *Classification and regression trees.*  
518 CRC press. Boca Raton, Florida. 368 pp.
- 519 Bryan-Brown DN, Connolly RM, Richards DR, et al. (2020). Global trends in mangrove  
520 forest fragmentation. *Sci Rep* 10: 7117.
- 521 Capblancq T. & Forester B.R. (2021) Redundancy analysis: A Swiss Army Knife for  
522 landscape genomics. *Methods in Ecology and Evolution*, 1–12.
- 523 Cavanaugh KC, Osland MJ, Bardou R, et al. (2018). Sensitivity of mangrove range limits to  
524 climate variability. *Glob Ecol Biogeogr* 27: 925–35.
- 525 Cerón-Souza I., Gonzalez E.G., Schwarzbach A.E., Salas-Leiva D.E., Rivera-Ocasio E.,  
526 Toro-Perea N., Bermingham E., & McMillan W.O. (2015) Contrasting demographic history and gene  
527 flow patterns of two mangrove species on either side of the Central American Isthmus. *Ecology and*  
528 *Evolution.* 5, 3486-3499.
- 529 Chen, I. C., Hill, J. K., Ohlemüller, R., Roy, D. B., & Thomas, C. D. (2011). Rapid range  
530 shifts of species associated with high levels of climate warming. *Science*, 333(6045), 1024-1026.



- 531 Cook-Patton, S. C., Lehmann, M., & Parker, J. D. (2015). Convergence of three mangrove  
532 species towards freeze-tolerant phenotypes at an expanding range edge. *Functional Ecology*. 29:10,  
533 1332-1340.
- 534 Cruz, MV, Mori, GM, Signori-Müller, C, da Silva, CC, Oh, DH, Dassanayake, M, Zucchi,  
535 MI, Oliveira, RS & de Souza, AP (2019). Local adaptation of a dominant coastal tree to freshwater  
536 availability and solar radiation suggested by genomic and ecophysiological approaches. *Scientific*  
537 *Reports*. 9, 1-15.
- 538 Cruz, M. V., Mori, G. M., Oh, D. H., Dassanayake, M., Zucchi, M. I., Oliveira, R. S., &  
539 Souza, A. P. D. (2020). Molecular responses to freshwater limitation in the mangrove tree *Avicennia*  
540 *germinans* (*Acanthaceae*). *Molecular Ecology*. 29:2, 344-362.
- 541 Da Silva, M. F., Cruz, M. V., Vidal Júnior, J. D. D., Zucchi, M. I., Mori, G. M., & De Souza,  
542 A. P. (2021). Geographical and environmental contributions to genomic divergence in mangrove  
543 forests. *Biological Journal of the Linnean Society*. 132:3, 573-589.
- 544 Davis M.B. & Shaw R.G. (2001) Range Shifts and Adaptive Responses to Quaternary  
545 Climate Change. *Science*, 292, 673–679.
- 546 Duke, N.C., Meynecke, J.O., Dittmann, S., Ellison, A.M., Anger, K., Berger, U., Cannicci, S.,  
547 Diele, K., Ewel, K.C., Field, C.D. & Koedam, N. (2007). A world without mangroves?. *Science*,  
548 317(5834), 41-42.
- 549 Duke, N. C., Kovacs, J. M., Griffiths, A. D., Preece, L., Hill, D. J., Van Oosterzee, P.,  
550 Mackenzie, J., Morning, H. S. & Burrows, D. (2017). Large-scale dieback of mangroves in  
551 Australia's Gulf of Carpentaria: a severe ecosystem response, coincidental with an unusually extreme  
552 weather event. *Marine and Freshwater Research*. 68:10, 1816-1829.
- 553 Eyring, V., Bony, S., Meehl, G. A., Senior, C. A., Stevens, B., Stouffer, R. J., and Taylor, K.  
554 E.: Overview of the Coupled Model Intercomparison Project Phase 6 (CMIP6) experimental design  
555 and organization, *Geosci. Model Dev.*, 9, 1937-1958, doi:10.5194/gmd-9-1937-2016, 2016.
- 556 Eong, O. J. (1993). Mangroves-a carbon source and sink. *Chemosphere*, 27(6), 1097-1107.
- 557 FAO (2007) *The world's mangroves 1980–2005*. FAO, Rome.



## **Brazilian *Avicennia* climatic vulnerability**

- 558 Fick, S. E., & Hijmans, R. J. (2017). WorldClim 2: new 1 km spatial resolution climate  
559 surfaces for global land areas. *International journal of climatology*, 37(12), 4302-4315.
- 560 Fitzpatrick, M. C., & Keller, S. R. (2015). Ecological genomics meets community-level  
561 modelling of biodiversity: Mapping the genomic landscape of current and future environmental  
562 adaptation. *Ecology letters*, 18(1), 1-16.
- 563 Fitzpatrick, M. C., Chhatre, V. E., Soolanayakanahally, R. Y., & Keller, S. R. (2021).  
564 Experimental support for genomic prediction of climate maladaptation using the machine learning  
565 approach Gradient Forests. *Molecular Ecology Resources*.
- 566 Forester, B. R., Lasky, J. R., Wagner, H. H., & Urban, D. L. (2018). Comparing methods for  
567 detecting multilocus adaptation with multivariate genotype–environment associations. *Molecular*  
568 *Ecology*, 27(9), 2215-2233.
- 569 Frankham, R. (2015), Genetic rescue of small inbred populations: meta-analysis reveals large  
570 and consistent benefits of gene flow. *Molecular Ecology*, 24: 2610-2618.  
571 <https://doi.org/10.1111/mec.13139>
- 572 Friess, D. A., Rogers, K., Lovelock, C. E., Krauss, K. W., Hamilton, S. E., Lee, S. Y., Lucas,  
573 S., Primavera, J., Rajkaran, A. & Shi, S. (2019). The state of the world's mangrove forests: past,  
574 present, and future. *Annual Review of Environment and Resources*. 44, 89-115.
- 575 Gilman, E. L., Ellison, J., Duke, N. C., & Field, C. (2008). Threats to mangroves from climate  
576 change and adaptation options: a review. *Aquatic Botany*, 89(2), 237-250.
- 577 Goldberg, L., Lagomasino, D., Thomas, N., & Fatoyinbo, T. (2020). Global declines in  
578 human-driven mangrove loss. *Global change biology*, 26(10), 5844-5855.
- 579 Gorelick, N., Hancher, M., Dixon, M., Ilyushchenko, S., Thau, D., & Moore, R. (2017).  
580 Google Earth Engine: Planetary-scale geospatial analysis for everyone. *Remote Sensing of*  
581 *Environment*. 202, 18-27.
- 582 Gorman, D. (2018). Historical Losses of Mangrove Systems in South America from Human-  
583 Induced and Natural Impacts. In *Threats to Mangrove Forests* (pp. 155-171). Springer, Cham.

- 584 Guo Z, Li X, He Z, et al. 2018. Extremely low genetic diversity across mangrove taxa reflects  
585 past sea level changes and hints at poor future responses. *Glob Chang Biol* 24: 1741–8.
- 586 Gutjahr O., Putrasahan D., Lohmann K., Jungclaus J.H., von Storch J.-S., Brüggemann N.,  
587 Haak H., & Stössel A. (2019) Max Planck Institute Earth System Model (MPI-ESM1.2) for the High-  
588 Resolution Model Intercomparison Project (HighResMIP). *Geosci. Model Dev.*, 12, 3241–3281.
- 589 Haddad NM, Brudvig LA, Clobert J, et al. 2015. Habitat fragmentation and its lasting impact  
590 on Earth’s ecosystems. *Sci Adv* 1: e1500052.
- 591 Hamilton, S.E., Friess, D.A. (2018) Global carbon stocks and potential emissions due to  
592 mangrove deforestation from 2000 to 2012. *Nature Climate Change*. 8, 240–244.
- 593 Hansen, M. C., Potapov, P. V, Moore, R., Hancher, M., Turubanova, S.A., Tyukavina, A.,  
594 Thau, D., Stehman, S. V, Goetz, S.J., Loveland, T.R., Kommareddy, A., Egorov, A., Chini, L.,  
595 Justice, C.O. & Townshend, J.R.G. (2013) High-Resolution Global Maps of 21st-Century Forest  
596 Cover Change. *Science*. 342, 850-853.
- 597 Hardie, D. C., & Hutchings, J. A. (2010). Evolutionary ecology at the extremes of species’  
598 ranges. *Environmental Reviews*, 18, 1-20.
- 599 Hickey, S. M., Phinn, S. R., Callow, N. J., Van Niel, K. P., Hansen, J. E., & Duarte, C. M.  
600 (2017). Is Climate Change Shifting the Poleward Limit of Mangroves? *Estuaries and Coasts*, 40(5),  
601 1215–1226. doi:10.1007/s12237-017-0211-8
- 602 Hijmans, R. (2021) “raster: Geographic Data Analysis and Modeling”. , R package version  
603 3.4-13, <https://cran.r-project.org/package=raster>
- 604 Jombart, T. (2008) adegenet: a R package for the multivariate analysis of genetic markers.  
605 *Bioinformatics*, 24, 1403–1405. doi: 10.1093/bioinformatics/btn129
- 606 Kawecki, T. J. and Ebert, D. (2004) Conceptual issues in local adaptation. *Ecology Letters*, 7,  
607 1225–1241.
- 608 Kennedy, J. P., Pil, M. W., Proffitt, C. E., Boeger, W. A., Stanford, A. M., & Devlin, D. J.  
609 (2016). Postglacial expansion pathways of red mangrove, *Rhizophora mangle*, in the Caribbean  
610 Basin and Florida. *American Journal of Botany*, 103:2, 260–276.

## Brazilian *Avicennia* climatic vulnerability

- 611 Kottler, E. J., Dickman, E. E., Sexton, J. P., Emery, N. C., & Franks, S. J. (2021). Draining  
612 the swamping hypothesis: little evidence that gene flow reduces fitness at range edges. *Trends in*  
613 *Ecology & Evolution*, 35:6, 533–544.
- 614 Liddell, E., Sunnucks, P., & Cook, C. N. (2021). To mix or not to mix gene pools for  
615 threatened species management? Few studies use genetic data to examine the risks of both actions,  
616 but failing to do so leads disproportionately to recommendations for separate management.  
617 *Biological Conservation*, 256, 109072.
- 618 Loarie, S. R., Duffy, P. B., Hamilton, H., Asner, G. P., Field, C. B., & Ackerly, D. D. (2009)  
619 The velocity of climate change. *Nature*. 462:7276, 1052–1055.
- 620 Lovelock, C. E., Feller, I. C., Reef, R., Hickey, S., & Ball, M. C. (2017) Mangrove dieback  
621 during fluctuating sea levels. *Scientific Reports*. 7:1680, 1010–1038.
- 622 Luu, K., Bazin, E., & Blum, M. (2017) pcadapt: an R package to perform genome scans for  
623 selection based on principal component analysis. *Molecular Ecology Resources* 17: 67–77.
- 624 Maier P.A. (2018). Evolutionary past, present, and future of the Yosemite toad (*Anaxyrus*  
625 *canorus*): A total evidence approach to delineating conservation units. Ph.D. dissertation. University  
626 of California Riverside, and San Diego State University, San Diego, CA.
- 627 Markesteijn, L., Poorter, L., Paz, H., Sack, L., & Bongers, F. (2011) Ecological  
628 differentiation in xylem cavitation resistance is associated with stem and leaf structural traits. *Plant,*  
629 *Cell & Environment*. 34, 137–148.
- 630 Mori, G. M, Zucchi, M. I., Souza, A. P. (2015) Multiple-Geographic-Scale Genetic Structure  
631 of Two Mangrove Tree Species: The Roles of Mating System, Hybridization, Limited Dispersal and  
632 Extrinsic Factors. *PLoS ONE*. 10:2, e0118710. <https://doi.org/10.1371/journal.pone.0118710>
- 633 Mori, G.M., Madeira, A.G., Cruz, M.V., Tsuda, Y., Takayama, K., Matsuki, Y., Suyama, Y.,  
634 Iwasaki, T., de Souza, A.P., Zucchi, M.I. & Kajita, T. (2021). Testing species hypotheses in the  
635 mangrove genus *Rhizophora* from the Western hemisphere and South Pacific islands. *Estuarine,*  
636 *Coastal and Shelf Science*, 248, p. 106948.

- 637 Nychka, D., Furrer, R., Paige, J., Sain, S. (2017) “fields: Tools for spatial data.”  
638 doi:10.5065/D6W957CT, R package version 12.5, <https://github.com/NCAR/Fields>.
- 639 Ochoa-Zavala, M., Jaramillo-Correa, J. P., Piñero, D., Nettel-Hernanz, A., Núñez-Farfán, J.  
640 (2019) Contrasting colonization patterns of black mangrove (*Avicennia germinans* (L.) L.) gene  
641 pools along the Mexican coasts. *J Biogeogr.* 46, 884–898. <https://doi.org/10.1111/jbi.13536>
- 642 Oksanen, J., Blanchet, F. G., Friendly, M., et al. (2020). vegan: Community Ecology Package.  
643 R package version 2.5-7. <https://CRAN.R-project.org/package=vegan>
- 644 Osland M. J., Enwright N. M., Day R. H., et al. (2016). Beyond just sea-level rise:  
645 considering macroclimatic drivers within coastal wetland vulnerability assessments to climate  
646 change. *Glob. Chang. Biol.*, 22, 1–11.
- 647 Osland M. J., Feher L. C., Griffith K. T., et al. (2016). Climatic controls on the global  
648 distribution, abundance, and species richness of mangrove forests. *Ecol. Monogr.* 87, 341–359.
- 649 Osland, M. J., Day, R. H., Hall, C. T., Brumfield, M. D., Dugas, J. L., & Jones, W. R. (2017).  
650 Mangrove expansion and contraction at a poleward range limit: climate extremes and land-ocean  
651 temperature gradients. *Ecology*, 98(1), 125–137.
- 652 Osland, M. J., Day, R. H., & Michot, T. C. (2020) Frequency of extreme freeze events  
653 controls the distribution and structure of black mangroves (*Avicennia germinans*) near their northern  
654 range limit in coastal Louisiana. *Diversity and Distributions.* 26:10, 1366–1382.
- 655 Polidoro, B. A., Carpenter, K. E., Collins, L., Duke, N. C., Ellison, A. M., Ellison, J. C.,  
656 Farnsworth, E. J., Fernando, E. S., Kathiresan, K., Koedam, N. E. & Livingstone, S. R. (2010). The  
657 loss of species: mangrove extinction risk and geographic areas of global concern. *PloS One*, 5(4),  
658 10095.
- 659 Qiao H., Soberón J., & Peterson A.T. (2015) No silver bullets in correlative ecological niche  
660 modelling: insights from testing among many potential algorithms for niche estimation. *Methods in*  
661 *Ecology and Evolution*, 1–11.
- 662 R Core team (2018). R: A language and environment for statistical computing.

## Brazilian *Avicennia* climatic vulnerability

- 663 Russello M., Waterhouse M. D., Etter P. D., Johnson E. A.. (2015). From promise to practice:  
664 pairing non-invasive sampling with genomics in conservation. PeerJ 3:e1106  
665 <https://doi.org/10.7717/peerj.1106>
- 666 Saintilan N., Wilson N. C., Rogers K., et al. (2014). Mangrove expansion and salt marsh  
667 decline at mangrove poleward limits. Glob. Chang. Biol., 20, 147–57.
- 668 Savolainen, O., Pyhäjärvi, T., & Knürr, T. (2007). Gene flow and local adaptation in trees.  
669 Annu. Rev. Ecol. Evol. Syst., 38, 595–619.
- 670 Schmitt, S., Pouteau, R., Justeau, D., De Boissieu, F., & Birnbaum, P. (2017) ssdm: An R  
671 package to predict distribution of species richness and composition based on stacked species  
672 distribution models. Methods in Ecology and Evolution, 8:12, 1795–1803.
- 673 Sippo, J. Z., Lovelock, C. E., Santos, I. R., Sanders, C. J., & Maher, D. T. (2018) Mangrove  
674 mortality in a changing climate: An overview. Estuarine, Coastal and Shelf Science, 215, 241–249.
- 675 Silva-Pereira, I., Meira-Neto, J. A. A., Rezende, V. L., & Eisenlohr, P. V. (2020).  
676 Biogeographic transitions as a source of high biological diversity: Phylogenetic lessons from a  
677 comprehensive ecotone of South America. Perspectives in Plant Ecology, Evolution and Systematics,  
678 44, 125528.
- 679 Soares MLG, Estrada GCD, Fernandez V, and Tognella MMP. 2012. Southern limit of the  
680 Western South Atlantic mangroves: Assessment of the potential effects of global warming from a  
681 biogeographical perspective. Estuar Coast Shelf Sci 101: 44–53.
- 682 Smith, S.J. & Ellis, N., (2020). Random Forest functions for the Census of Marine Life  
683 synthesis project. R package version 0.1-18.
- 684 Triest L., Van der Stocken T., De Ryck D., Kochzius M., Lorent S., Ngeve M., Ratsimbazafy  
685 H. A., Sierens T., van der Ven R. and Koedam N. (2021) Expansion of the mangrove species  
686 *Rhizophora mucronata* in the Western Indian Ocean launched contrasting genetic patterns. Scientific  
687 reports. 11:1, 1–6.

688 Triest, L., Van der Stocken, T., Allela Akinyi, A., Sierens, T., Kairo, J., Koedam, N. (2020)  
689 Channel network structure determines genetic connectivity of landward–seaward *Avicennia marina*  
690 populations in a tropical bay. *Ecol. Evol.* 10, 12059–12075.

691 UNEP (2014). *The Importance of Mangroves to People: A Call to Action*. van Bochove, J.,  
692 Sullivan, E. and Nakamura, T. (eds). Cambridge, UK: UN Environment Programme World  
693 Conservation Monitoring Centre (WCMC).

694 Van der Stocken, T., Wee, A. K. S., De Ryck, D. J. R., Vanschoenwinkel, B., Friess, D.A.,  
695 Dahdouh-Guebas, F., Simard, M., Koedam, N. and Webb, E.L. (2019) A general framework for  
696 propagule dispersal in mangroves. *Biol. Rev.*, 94, 1547–1575.

697 Zizka A., Silvestro D., Andermann T., Azevedo J., Duarte Ritter C., Edler D., Farooq H.,  
698 Herdean A., Ariza M., Scharn R., Svantesson S., Wengström N., Zizka V., & Antonelli A. (2019)  
699 CoordinateCleaner: Standardized cleaning of occurrence records from biological collection  
700 databases. *Methods in Ecology and Evolution*, 10, 744–751.

701

## Brazilian *Avicennia* climatic vulnerability

### 702 **Figures**

703 **Fig. 1.** Diagram of the analyses and datasets applied to estimate the vulnerability of individual  
704 populations to climate change based on the projected adaptive allelic frequencies and habitat loss.

705

706 **Fig. 2. (A)** Sampled locations for *Avicennia germinans* (black diamonds) and *Avicennia schaueriana*  
707 (empty circles) and the northeastern extremity of South America (NEESA) (star). **(B)** Present and  
708 future (2100; SSP5-8.5) climatic conditions for each site based on WorldClim 2.0 (Fick & Hijmans  
709 2017).

710

711 **Fig. 3. (A)** Procrustes differences between the present and future frequencies of the outlier and  
712 reference (i.e., neutral) loci for populations of *Avicennia germinans* obtained with gradient forest and  
713 RDA/PCAdapt; the yellow dots represent the proportion of forest cover lost by 2020. **(B)** Yearly  
714 deforestation rates (2000–2020) for each *A. germinans* region included in our study.

715

716 **Fig. 4. (A)** Procrustes differences between the present and future frequencies of the outlier and  
717 reference (i.e., neutral) loci for populations of *Avicennia schaueriana* obtained with gradient forest  
718 RDA/PCAdapt; the yellow dots represent the proportion of forest cover lost by 2020. **(B)** Yearly  
719 deforestation rates (2000–2020) for each *A. schaueriana* region included in our study.

720

721 **Fig. 5. (A)** Climate-only ensemble distribution model of *Avicennia germinans* for current and future  
722 climate scenarios and individual population trends. **(B)** Climate-only ensemble distribution model of  
723 *Avicennia schaueriana* for current and future climate scenarios and individual population trends. The  
724 dashed red line represents the north–south population division found in the northeast extremity of  
725 South America (NEESA).

726



727 **1. Tables**

728 **Table 1.** Population name codes, geographic coordinates, and sample sizes of *Avicennia germinans*  
729 and *Avicennia schaueriana* individuals sampled for the genomic environmental association analysis.

| Species                    | Population                   | N   | Latitude  | Longitude |
|----------------------------|------------------------------|-----|-----------|-----------|
| <i>Avicennia germinans</i> | MRJ                          | 8   | -0.70565  | -48.48630 |
|                            | PAB                          | 18  | -0.93917  | -46.72139 |
|                            | ALC                          | 5   | -2.40971  | -44.40573 |
|                            | PNB                          | 9   | -2.78051  | -41.82358 |
|                            | PRC                          | 7   | -3.41269  | -39.05708 |
|                            | TMD                          | 10  | -8.58974  | -35.06445 |
|                            | <i>Avicennia schaueriana</i> | PAR | 9         | -0.82377  |
| ALC                        |                              | 6   | -2.40971  | -44.40573 |
| PRC                        |                              | 9   | -3.41269  | -39.05708 |
| VER                        |                              | 9   | -12.93400 | -38.67420 |
| GPM                        |                              | 9   | -22.69890 | -43.00152 |
| UBA                        |                              | 9   | -23.49000 | -45.16300 |
| CNN                        |                              | 8   | -24.89710 | -47.84720 |
| PPR                        |                              | 8   | -25.57500 | -48.35250 |
| FLN                        |                              | 7   | -27.56780 | -48.51890 |
| LGN                        |                              | 3   | -28.48460 | -48.84240 |

730

## Brazilian *Avicennia* climatic vulnerability

731 **Table 2.** Overall importance of variables according to the impurity reduction measured by the Gini  
 732 index (Breiman et al., 1984) for *Avicennia germinans* and *Avicennia schaueriana* outlier and  
 733 reference loci (i.e., neutral) calculated by the gradient forest models.

| Environmental predictor         | <i>Avicennia germinans</i>     |                              | <i>Avicennia schaueriana</i>   |                              |
|---------------------------------|--------------------------------|------------------------------|--------------------------------|------------------------------|
|                                 | Overall importance (reference) | Overall importance (outlier) | Overall importance (reference) | Overall importance (outlier) |
| Mean annual air temperature     | 0.02                           | <b>0.11</b>                  | 0.07                           | <b>0.17</b>                  |
| Annual precipitation amount     | 0.05                           | 0.02                         | 0.01                           | 0.05                         |
| Precipitation seasonality       | 0.04                           | <b>0.11</b>                  | 0.07                           | <b>0.16</b>                  |
| Isothermality                   | 0.04                           | <b>0.08</b>                  | 0.06                           | <b>0.15</b>                  |
| Annual range of air temperature | 0.04                           | <b>0.13</b>                  | 0.07                           | <b>0.19</b>                  |
| Distance                        | 0.04                           | <b>0.09</b>                  | 0.04                           | <b>0.08</b>                  |
| Growing season length           | 0.04                           | 0.02                         | 0.02                           | 0.04                         |
| Ocean salinity                  | 0.04                           | <b>0.09</b>                  | 0.02                           | 0.1                          |
| Ocean surface temperature       | 0.02                           | 0.01                         | 0.06                           | <b>0.11</b>                  |

734

735 **Table 3.** Summarized variations in present and future (2100, RCP85/SSP-85) adaptive allelic  
 736 frequencies (Procrustes differences between present and future scenarios), accumulated forest loss  
 737 since 2000 (%) based on current local deforestation rates, and suitability differences based on  
 738 ensemble presence-absence species distribution models (%).

| Species                    | Population | Adaptive mismatch | Accumulated forest loss since 2000 (%) | Environmental suitability variation (%) |
|----------------------------|------------|-------------------|----------------------------------------|-----------------------------------------|
| <i>Avicennia germinans</i> | ALC        | 0.0036            | 6.84                                   | -0.04                                   |
|                            | MRJ        | 0.0023            | 13.30                                  | -0.10                                   |
|                            | PAb        | 0.0023            | 2.49                                   | +0.27                                   |
|                            | PNB        | 0.0070            | 8.36                                   | +4.52                                   |
|                            | PRC        | 0.0061            | 96.81                                  | +5.38                                   |

**Brazilian *Avicennia* climatic vulnerability**

|                              |     |        |       |         |
|------------------------------|-----|--------|-------|---------|
|                              | TMD | 0.0048 | 9.37  | +0.90   |
| <i>Avicennia schaueriana</i> | ALC | 0.0023 | 6.84  | 0.00    |
|                              | CNN | 0.0016 | 0.49  | +0.75   |
|                              | FLN | 0.0012 | 2.63  | +2.57   |
|                              | GPM | 0.0012 | 5.62  | +1.87   |
|                              | LGN | 0.0017 | 22.72 | +36.67  |
|                              | PAR | 0.0016 | 1.61  | 0.00    |
|                              | PPR | 0.0016 | 0.92  | 0.00    |
|                              | PRC | 0.0018 | 96.81 | +150.86 |
|                              | UBA | 0.0019 | 0.58  | +1.60   |
|                              | VER | 0.0048 | 14.60 | +3.91   |

739

In review

## **Brazilian *Avicennia* climatic vulnerability**

### 740 **Supplementary material**

741 **Supplementary Figure 1.** Manhattan plots for **(A)** *Avicennia schaueriana* and **(B)** *Avicennia*  
742 *germinans* loci identified by PCAdapt as SNPs with MAF > 0.05.

743 **Supplementary Figure 2.** Score plots of the sampled individuals of **(A)** *Avicennia germinans* and  
744 **(B)** *Avicennia schaueriana* and the axis (PC1 and PC2) with the greatest explanatory power for  
745 population structure (identified by PCAdapt).

746 **Supplementary Figure 3.** Total forest cover loss (in square kilometers) during 2001–2020 for each  
747 mangrove region (10 km buffer) sampled in this study. The data were calculated using the Global  
748 Forest Change dataset version 1.8 (Hansen et al. 2013).

749 **Supplementary Table 1.** Geographic and environmental information on the *Avicennia germinans*  
750 and *Avicennia schaueriana* populations sampled in this study.

751 **Supplementary Table 2.** Forest cover losses and climate suitability changes for the *Avicennia*  
752 *germinans* and *Avicennia schaueriana* populations sampled in this study.

753 **Supplementary Table 3.** *Avicennia germinans* and *Avicennia schaueriana* occurrence records used  
754 for the modeling step.

755 **Supplementary Data 1.** R script used for generating the genomic-environmental models.

756

### 757 **Conflict of Interest**

758 The authors declare that the research was conducted in the absence of any commercial or financial  
759 relationships that could be construed as potential conflicts of interest.

760

### 761 **2. Author Contributions**

762 JDV developed the methodology, prepared the figures, and wrote the foundational manuscript and  
763 supplementary data. GMM conceived of the study, provided data and assisted with writing. MVC

764 conceived the study, generated the genomic data and analyzed the data. MFS assisted with the  
765 Bayenv2 analysis, discussion of the results and manuscript writing. YAM assisted with the  
766 manuscript writing and discussion of the results. APS conceived of the study and provided project  
767 leadership.

768

### 769 **3. Funding**

770 This work was supported by the Conselho Nacional de Desenvolvimento Científico e  
771 Tecnológico (CNPq) in the form of a scholarship to JDV (process number 153973/2018–8), a  
772 research grant to GMM (process number 448286/2014–9), and a research fellowship to APS (process  
773 number 312777/2018–3). GMM acknowledges the Fundação de Amparo à Pesquisa do Estado de  
774 São Paulo (FAPESP) for research fellowships (process numbers 2013/08086–1, PD BEPE  
775 2014/22821–9). MVC thanks the FAPESP for a Ph.D. scholarship (process number 2013/26793-7).  
776 YAM thanks the FAPESP for a fellowship (process number 2019/21100–00) and the Coordenação de  
777 Aperfeiçoamento de Pessoal de Nível Superior-CAPES (process number 88887.373880/2019–00) for  
778 Ph.D. scholarships. MFS thanks the FAPESP (process number 2020/00203–2) for a Ph.D.  
779 scholarship. APS also thanks the CAPES Computational Biology Program (process number  
780 88882.160095/2013–01) for a research grant. This study was financed in part by CAPES (Finance  
781 Code 001).

### 782 **4. Acknowledgments**

783 JDV thanks Dr. Paul Andrew Maier for sharing a brilliant tutorial on how to implement GF  
784 models in genomic-environmental association studies.

785

### 786 **5. Data Availability Statement**

787 The datasets are available as supplementary material.

Figure 1.TIF

bioRxiv preprint doi: <https://doi.org/10.1101/2022.02.11.480143>; this version posted February 14, 2022. The copyright holder for this preprint (which was not certified by peer review) is the author/funder. All rights reserved. No reuse allowed without permission.

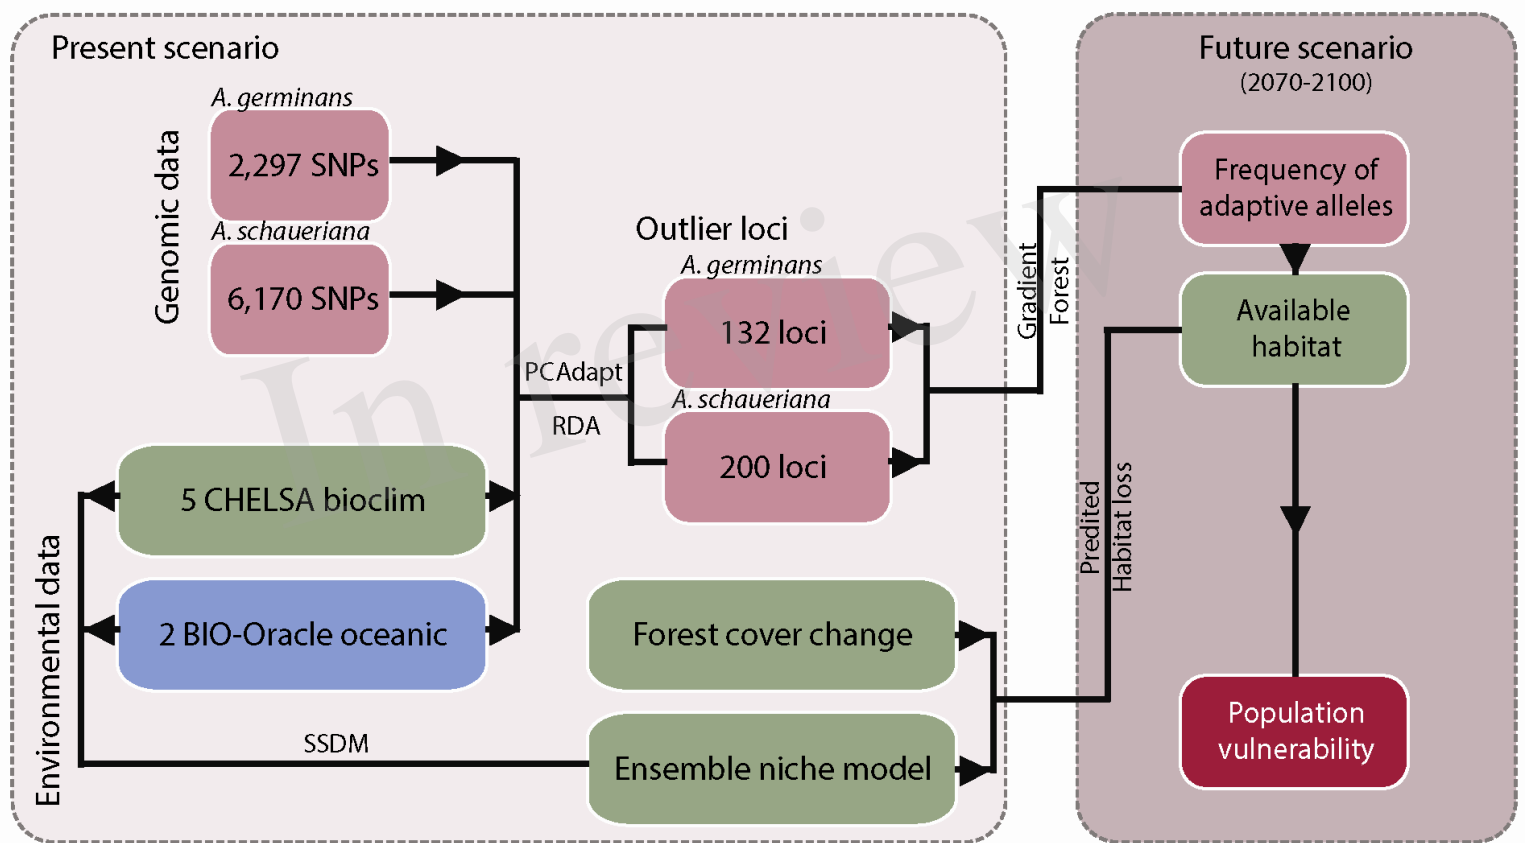

Figure 2.TIF

bioRxiv preprint doi: <https://doi.org/10.1101/2022.02.11.480143>; this version posted February 14, 2022. The copyright holder for this preprint (which was not certified by peer review) is the author/funder. All rights reserved. No reuse allowed without permission.

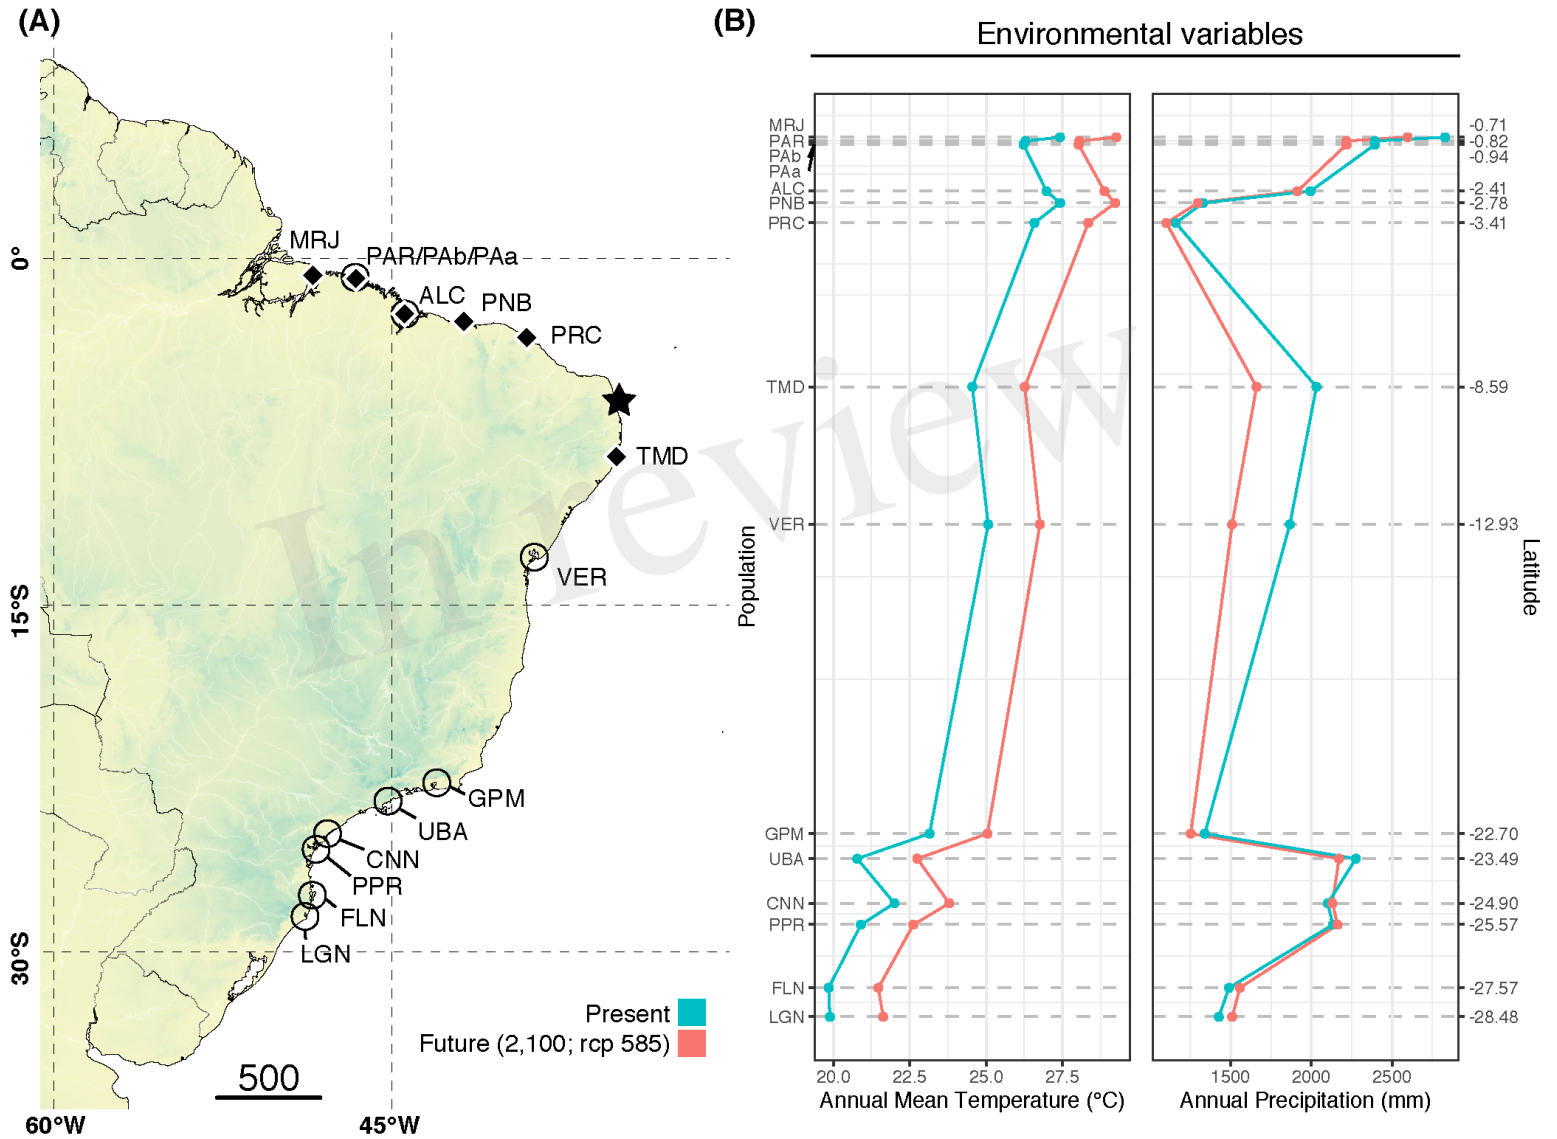



Figure 3.TIF

bioRxiv preprint doi: <https://doi.org/10.1101/2022.02.11.480143>; this version posted February 14, 2022. The copyright holder for this preprint (which was not certified by peer review) is the author/funder. All rights reserved. No reuse allowed without permission.

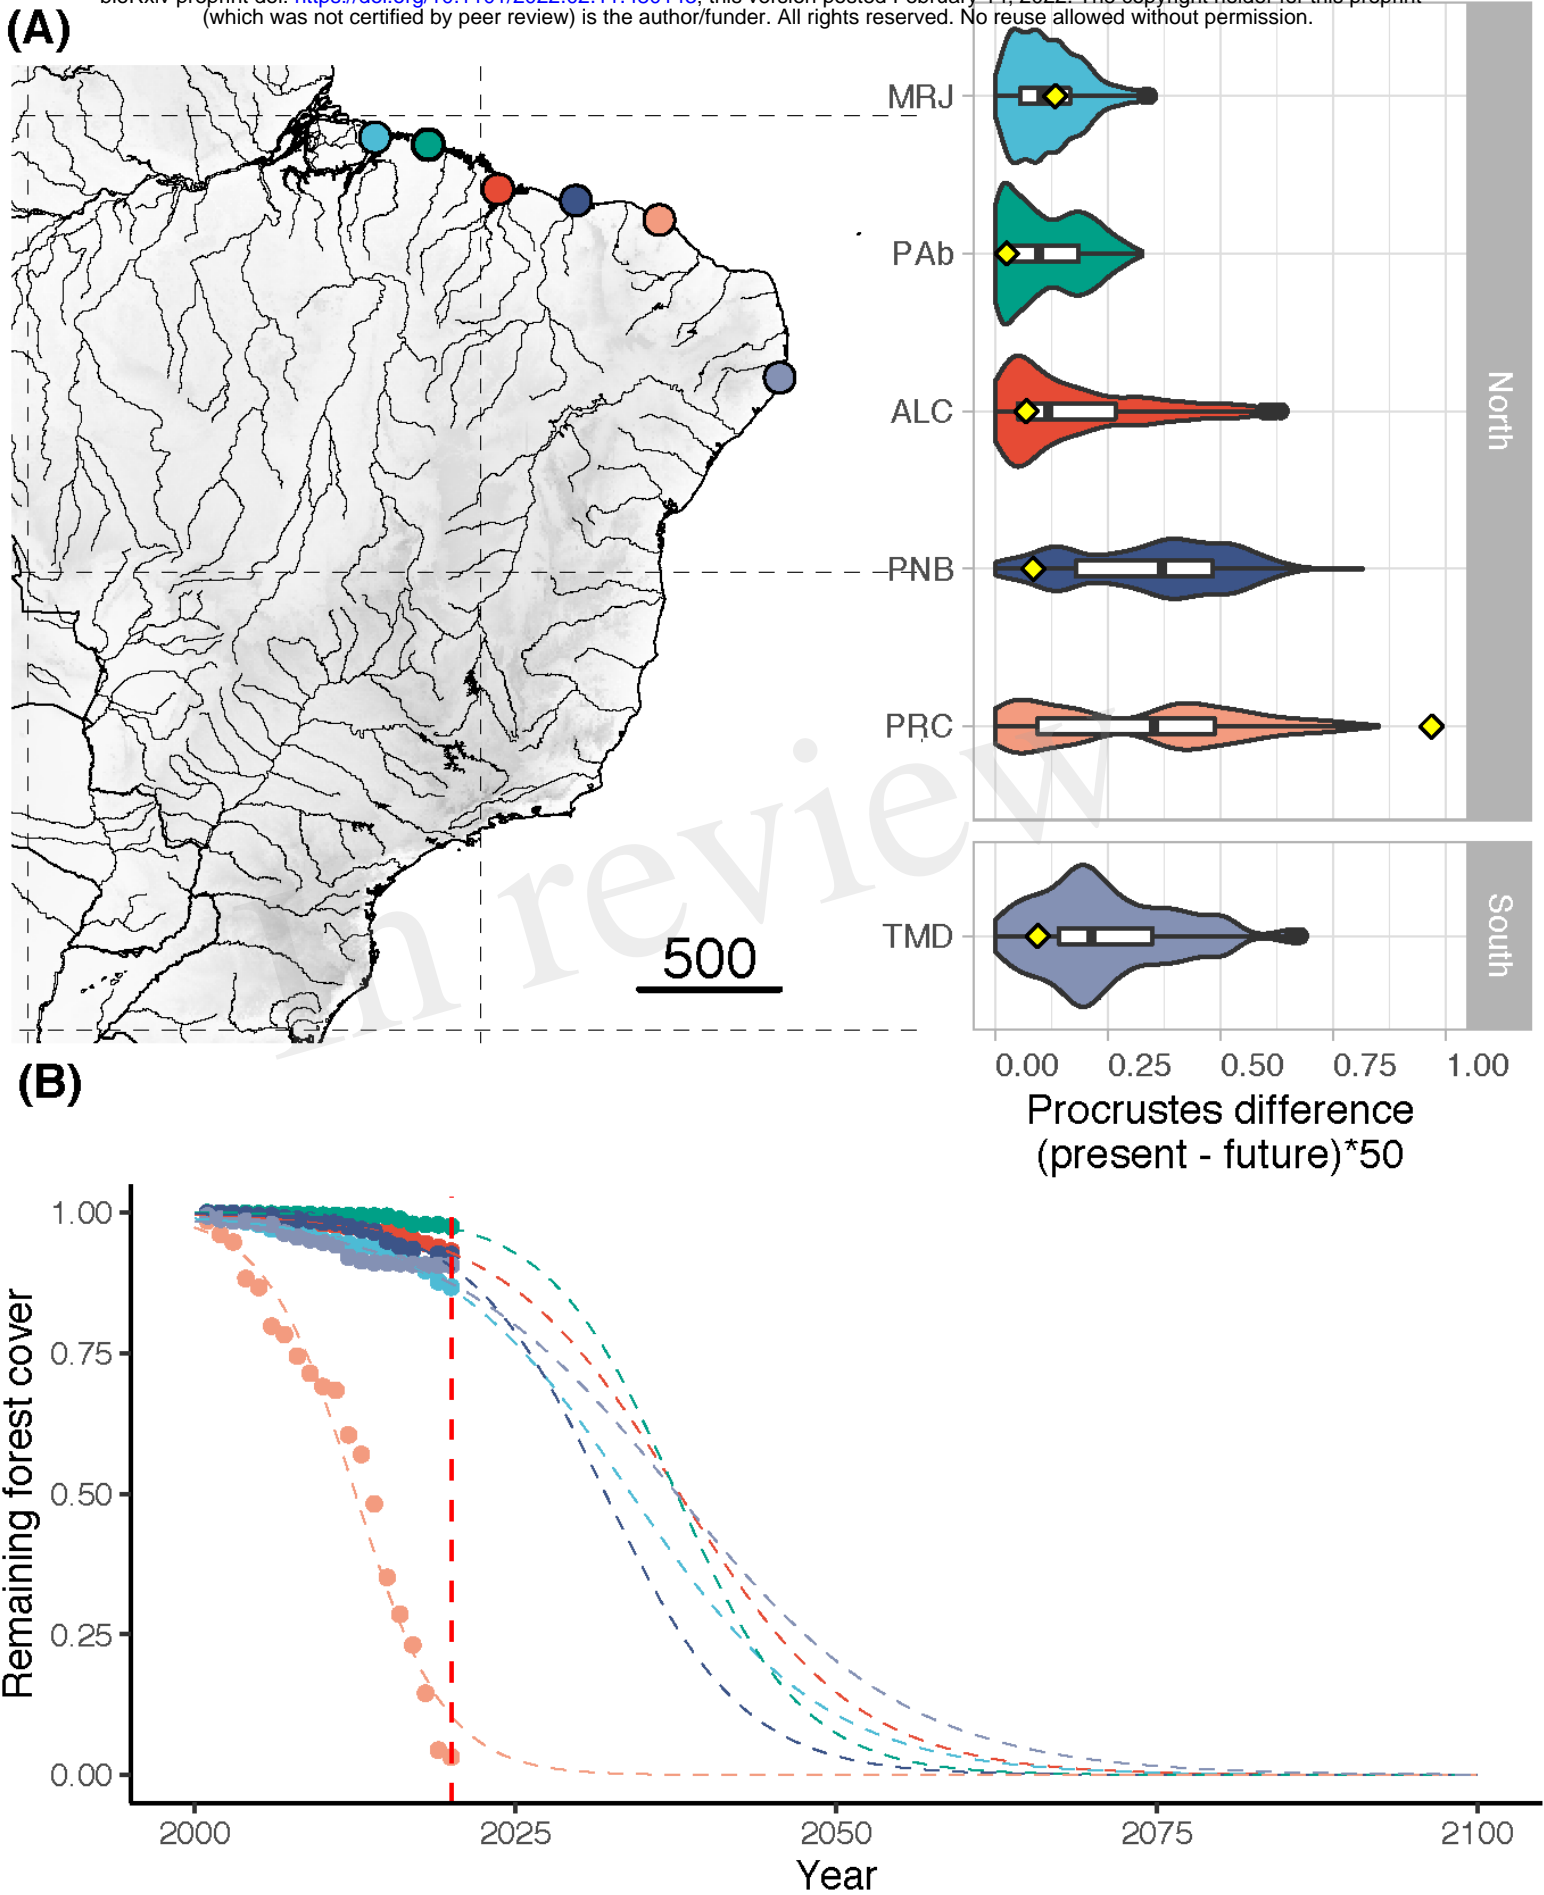

Figure 4.TIF

bioRxiv preprint doi: <https://doi.org/10.1101/2022.02.11.480143>; this version posted February 14, 2022. The copyright holder for this preprint (which was not certified by peer review) is the author/funder. All rights reserved. No reuse allowed without permission.

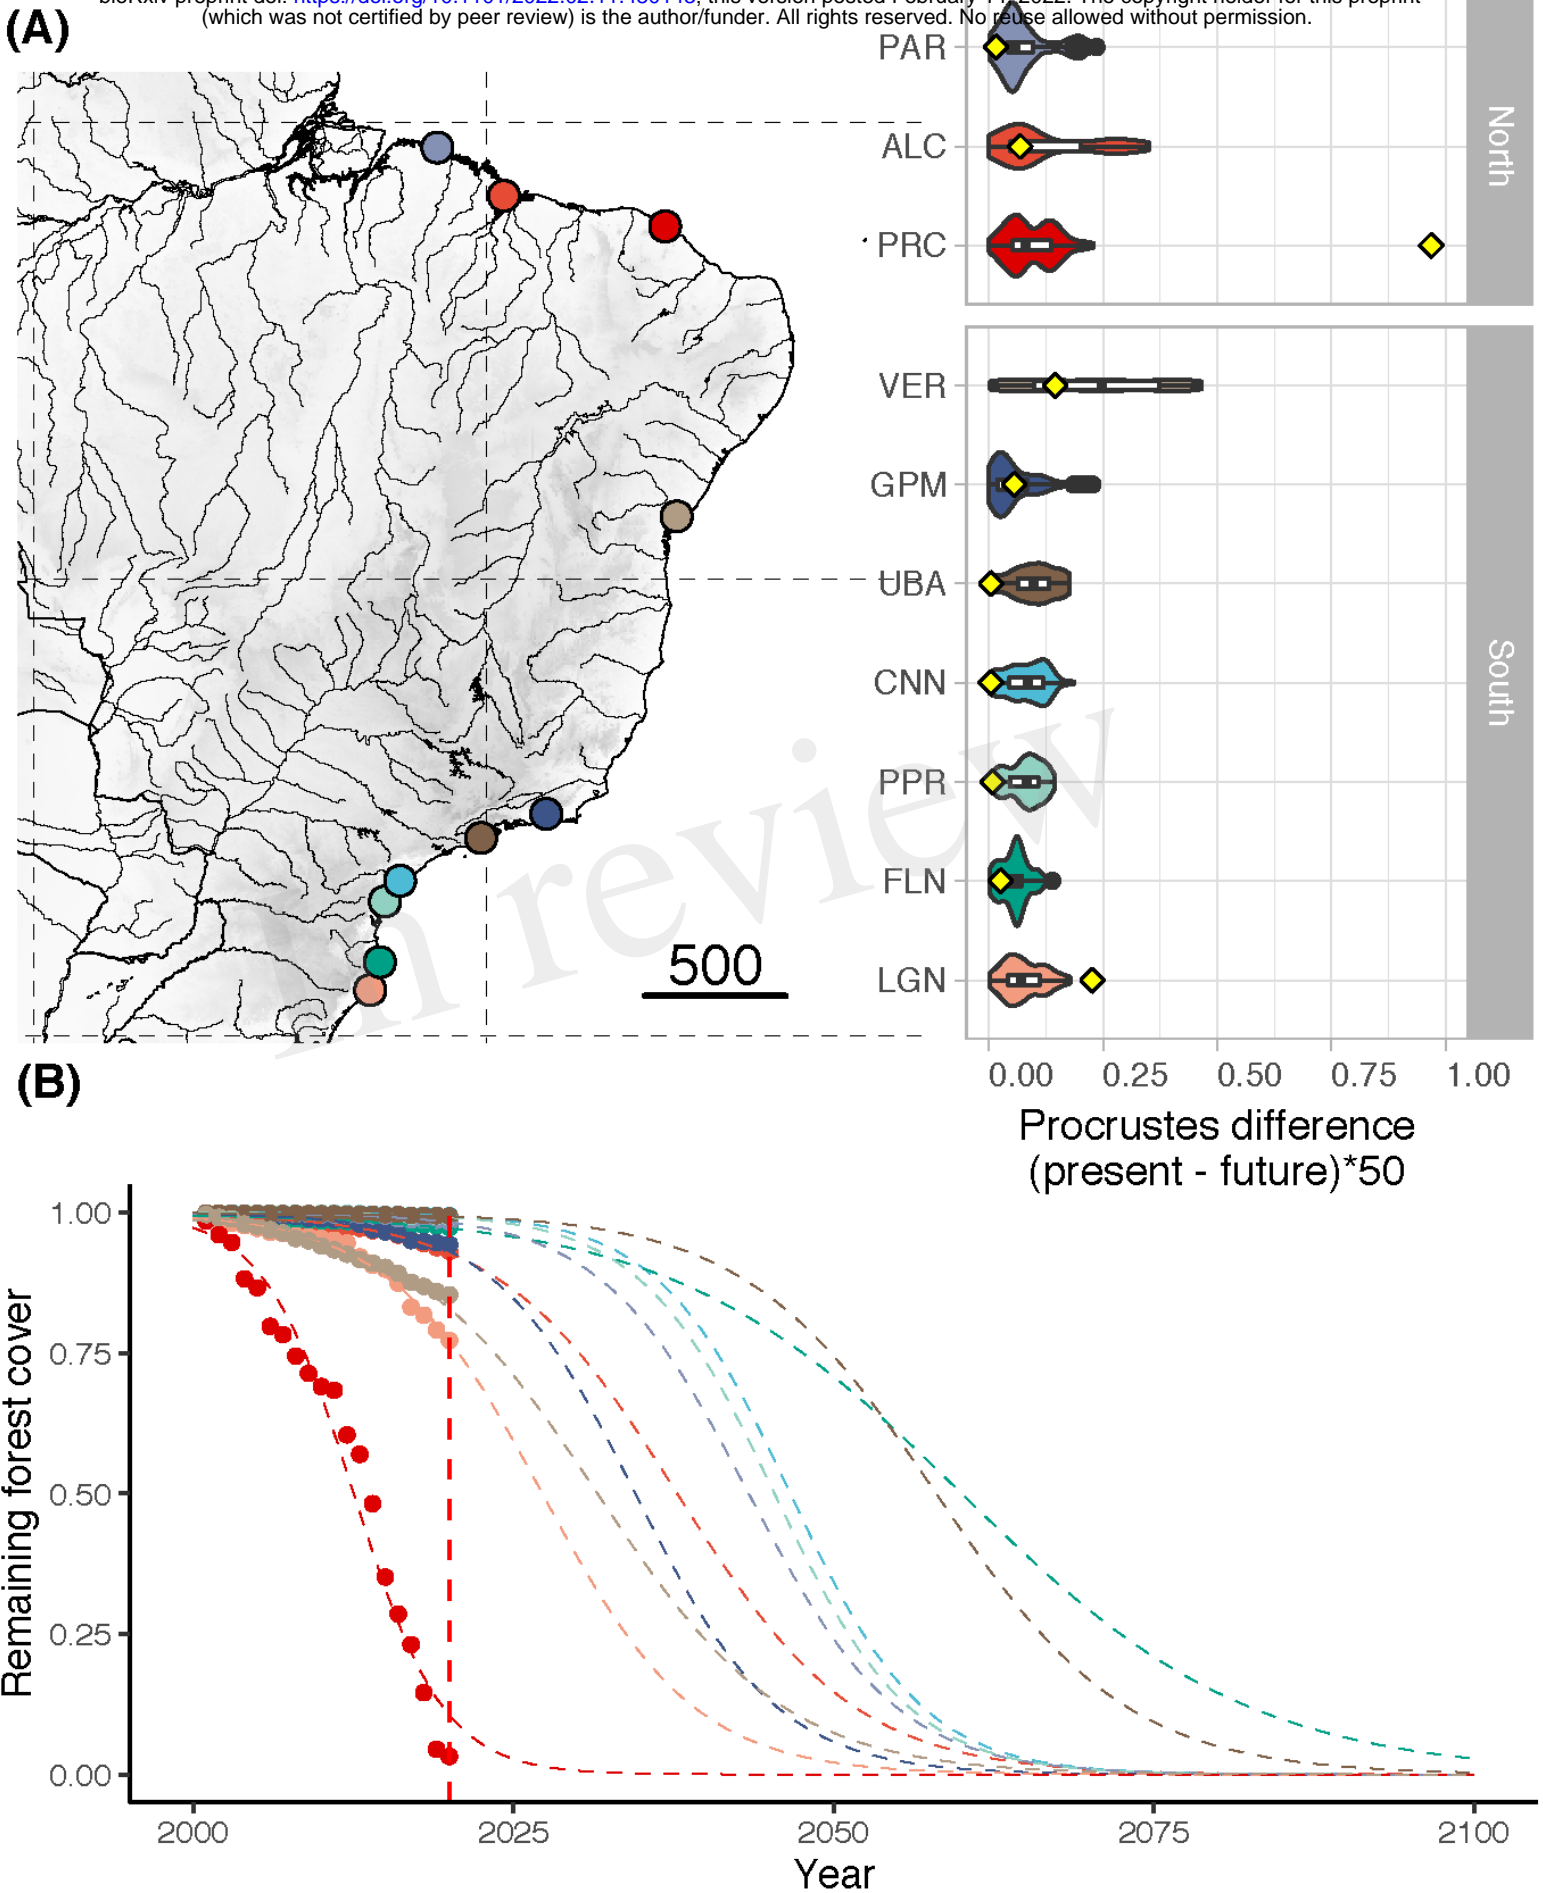

Figure 5.TIFF

Present

Future (2100, RCP85)

bioRxiv preprint doi: <https://doi.org/10.1101/2022.02.11.480143>; this version posted February 14, 2022. The copyright holder for this preprint (which was not certified by peer review) is the author/funder. All rights reserved. No reuse allowed without permission.

*Avicennia germinans*

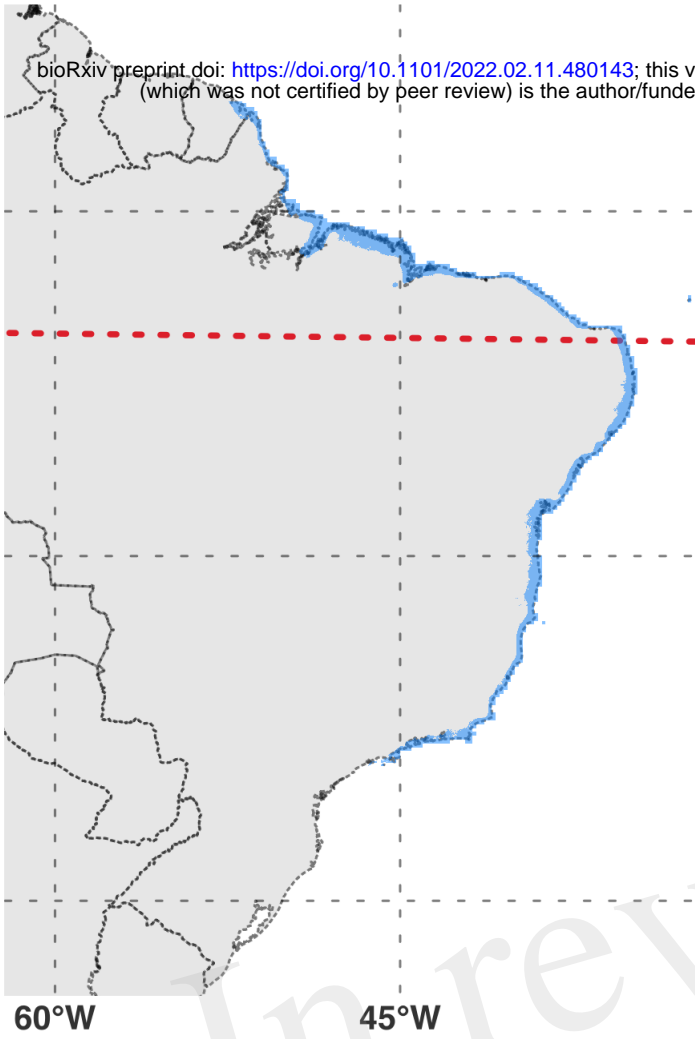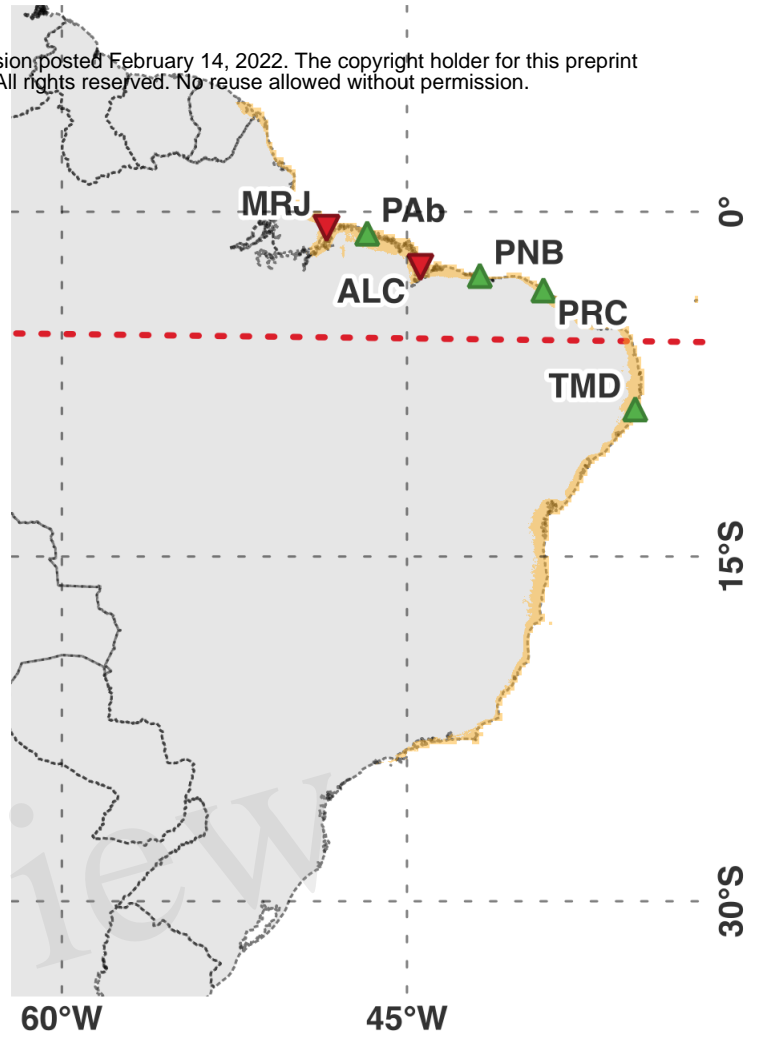

*Avicennia schaueriana*

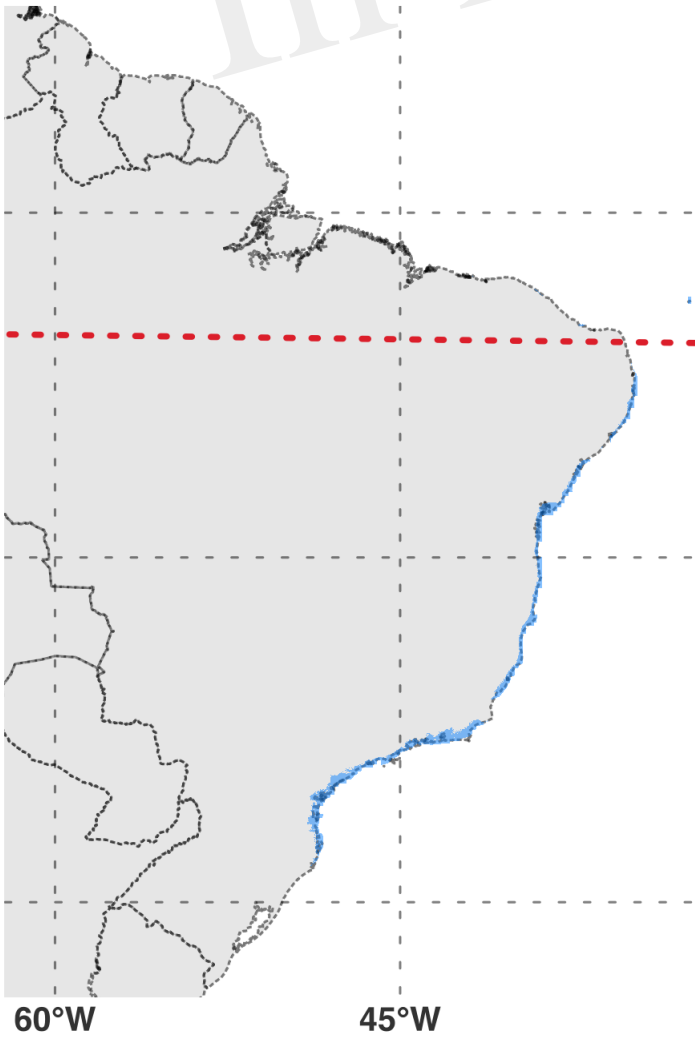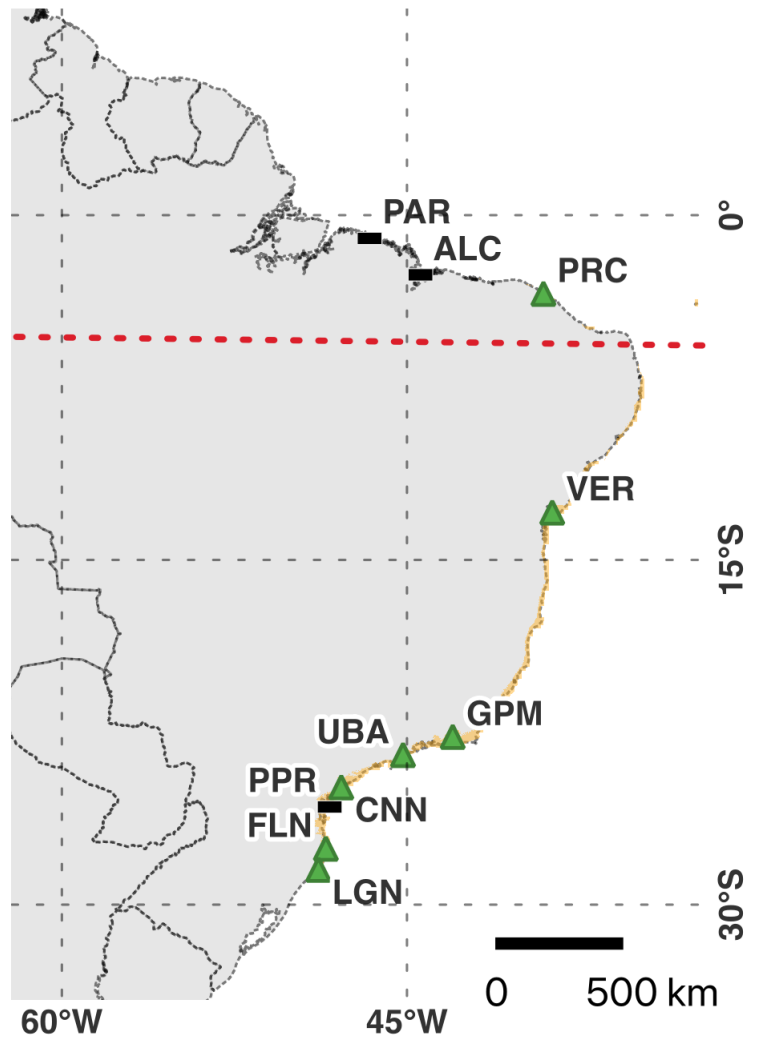

Source: https://www.biorxiv.org/content/10.1101/2022.02.11.480143.full.pdf
